# Supplementary material for: Dendrimer‐Encapsulated Pd Nanoparticles, Immobilized in Silica Pores, as Catalysts for Selective Hydrogenation of Unsaturated Compounds
Source: PubMed Central journal article supplement — ChemistryOpen. 2019 Mar 28;8(3):358–81. doi: 10.1002/open.201800280 (PMC6437834; doi:10.1002/open.201800280), 2019-03-28
Supplement: OPEN-8-358-s001.pdf [file OPEN-8-358-s001.pdf]

# Supporting Information

© Copyright Wiley-VCH Verlag GmbH & Co. KGaA, 69451 Weinheim, 2019

## **Dendrimer-Encapsulated Pd Nanoparticles, Immobilized in Silica Pores, as Catalysts for Selective Hydrogenation of Unsaturated Compounds**

Edward A. Karakanov, Anna V. Zolotukhina, Andrey O. Ivanov, and Anton L. Maximov\*©  
2019 The Authors. Published by Wiley-VCH Verlag GmbH & Co. KGaA.

This is an open access article under the terms of the Creative Commons Attribution Non-Commercial NoDerivs License, which permits use and distribution in any medium, provided the original work is properly cited, the use is non-commercial and no modifications or adaptations are made.

## Table of contents

### Tables

|                                                                                                                                          |     |
|------------------------------------------------------------------------------------------------------------------------------------------|-----|
| <b>Table S1.</b> Physical chemical properties of the dendrimer-based organo-silica carriers                                              | S3  |
| <b>Table S2.</b> Porosity properties of dendrimer-based hybrid materials according to nitrogen low temperature adsorption and desorption | S3  |
| <b>Table S3.</b> <i>d</i> -spacings in the G2-dendr- <i>meso</i> -SiO <sub>2</sub> -Pd sample                                            | S10 |
| <b>Table S4.</b> Hydrogenation of 1-hexyne in the presence of the dendrimer-based organo-silica palladium catalysts                      | S16 |
| <b>Table S5.</b> Hydrogenation of 1-octyne in the presence of the dendrimer-based organo-silica palladium catalysts                      | S17 |
| <b>Table S6.</b> Hydrogenation of 4-octyne in the presence of the dendrimer-based organo-silica palladium catalysts                      | S19 |
| <b>Table S7.</b> Hydrogenation of dienes in the presence of G2-dendr- <i>meso</i> -SiO <sub>2</sub> -Pd catalyst                         | S22 |
| <b>Table S8.</b> Hydrogenation of dienes in the presence of G3-dendr-SiO <sub>2</sub> -Pd catalyst                                       | S24 |
| <b>Table S9.</b> Hydrogenation of dienes in the presence of <i>meso</i> -G2-dendr-Si-Pd catalyst                                         | S26 |
| <b>Table S10.</b> Hydrogenation of alkynes in the presence of Pd catalysts                                                               | S29 |
| <b>Table S11.</b> Hydrogenation of dienes in the presence of Pd catalysts                                                                | S31 |
| <b>References</b>                                                                                                                        | S33 |

### Figures

|                                                                                                                                                      |     |
|------------------------------------------------------------------------------------------------------------------------------------------------------|-----|
| <b>Figure S1.</b> TEM image of hybrid G3-dendr-SiO <sub>2</sub> material                                                                             | S4  |
| <b>Figure S2.</b> TEM image of hybrid G2-dendr- <i>meso</i> -SiO <sub>2</sub> material                                                               | S5  |
| <b>Figure S3.</b> TEM image of hybrid <i>meso</i> -G2-dendr-Si material                                                                              | S6  |
| <b>Figure S4.</b> <sup>13</sup> C MAS NMR spectra of dendrimer-based organo-silica carriers                                                          | S7  |
| <b>Figure S5.</b> G2-dendr- <i>meso</i> -SiO <sub>2</sub> -Pd TEM image                                                                              | S8  |
| <b>Figure S6.</b> G2-dendr- <i>meso</i> -SiO <sub>2</sub> -Pd HRTEM image                                                                            | S9  |
| <b>Figure S7.</b> Electron diffraction pattern from G2-dendr- <i>meso</i> -SiO <sub>2</sub> -Pd sample                                               | S10 |
| <b>Figure S8.</b> <sup>13</sup> C MAS NMR spectra of G2-dendr- <i>meso</i> -SiO <sub>2</sub> -Pd catalyst and its carrier                            | S11 |
| <b>Figure S9.</b> <i>Meso</i> -G2-dendr-Si-Pd TEM image                                                                                              | S12 |
| <b>Figure S10.</b> G3-dendr-SiO <sub>2</sub> -Pd TEM image                                                                                           | S13 |
| <b>Figure S11.</b> Particle size distribution and for G3-dendr-SiO <sub>2</sub> -Pd and pore size distribution for G3-dendr-SiO <sub>2</sub> carrier | S14 |
| <b>Figure S12.</b> TEM image for G3-dendr-SiO <sub>2</sub> -Pd catalyst in the dark field                                                            | S14 |
| <b>Figure S13.</b> <sup>13</sup> C MAS NMR spectra of G3-dendr-SiO <sub>2</sub> -Pd catalyst and its carrier                                         | S15 |
| <b>Figure S14.</b> Hydrogenation of styrenes in the presence of <i>meso</i> -G2-dendr-Si-Pd catalyst                                                 | S15 |
| <b>Figure S15.</b> Hydrogenation of 1,3-cyclooctadiene in the presence of G3-dendr-SiO <sub>2</sub> -Pd catalyst                                     | S20 |
| <b>Figure S16.</b> Hydrogenation of 1,3-cyclooctadiene in the presence of <i>meso</i> -G2-dendr-Si-Pd catalyst                                       | S20 |
| <b>Figure S17.</b> Hydrogenation of 1,5-cyclooctadiene in the presence of <i>meso</i> -G2-dendr-Si-Pd catalyst                                       | S20 |
| <b>Figure S18.</b> A proposed structure of <i>meso</i> -G2-dendr-Si-Pd catalyst                                                                      | S21 |
| <b>Figure S19.</b> $\pi$ -allylic intermediates, formed in the hydrogenation of conjugated dienes in the presence of Pd catalysts                    | S28 |
| <b>Scheme S1.</b> Immobilization on PPI dendrimers on the surface of silica polyamine composite                                                      | S3  |

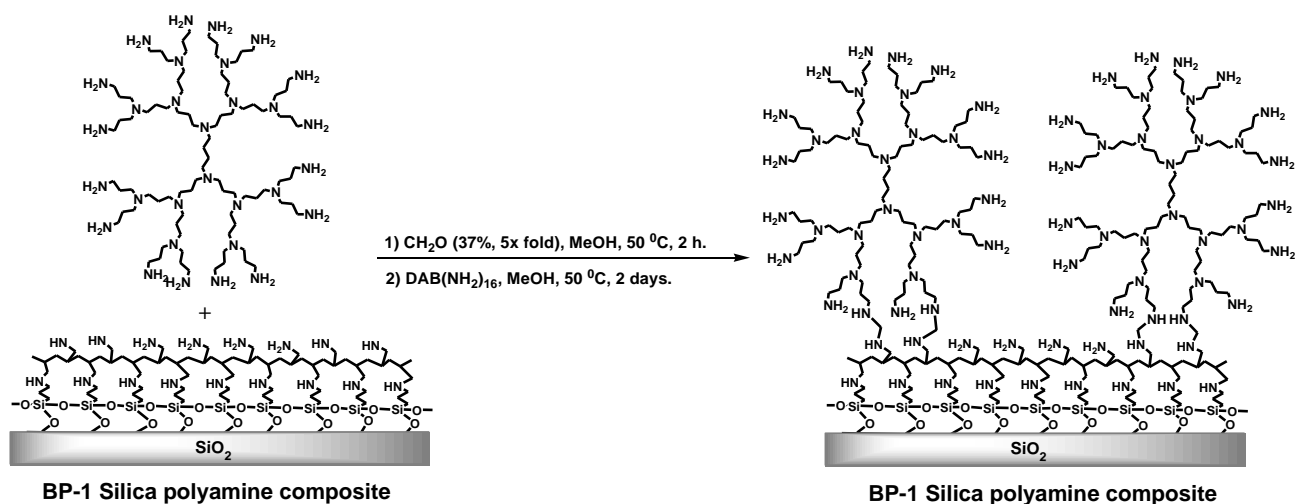

**Scheme S1.** Immobilization on PPI dendrimers on the surface of silica polyamine composite.<sup>[1]</sup>

**Table S1.** Physical chemical properties of the dendrimer-based organo-silica carriers

| Method                     | G3-dendr-SiO <sub>2</sub>                                                                                                                                                                                                                                                                                                                                                                                                                                                                                                                                                                           | G2-dendr-meso-SiO <sub>2</sub>                                                                                                                                                                                                                                                                                                                                                 | meso-G2-dendr-Si                                                                                                                                                                                                                                                                                                                                                                                                                                                                                                                                                                                                                                                                                                                                    |
|----------------------------|-----------------------------------------------------------------------------------------------------------------------------------------------------------------------------------------------------------------------------------------------------------------------------------------------------------------------------------------------------------------------------------------------------------------------------------------------------------------------------------------------------------------------------------------------------------------------------------------------------|--------------------------------------------------------------------------------------------------------------------------------------------------------------------------------------------------------------------------------------------------------------------------------------------------------------------------------------------------------------------------------|-----------------------------------------------------------------------------------------------------------------------------------------------------------------------------------------------------------------------------------------------------------------------------------------------------------------------------------------------------------------------------------------------------------------------------------------------------------------------------------------------------------------------------------------------------------------------------------------------------------------------------------------------------------------------------------------------------------------------------------------------------|
| IR, cm <sup>-1</sup>       | 3446.70 (O-H <sub>st</sub> and N-H <sub>st</sub> , NH-C(-OH), br);<br>2940 (C-H <sub>st</sub> ); 2927.73 (C-H <sub>st</sub> , CH <sub>2</sub> -O <sub>st</sub> );<br>2845 (C-H <sub>st</sub> , CH <sub>2</sub> -N <sub>st</sub> ); 1750 (C=O <sub>st</sub> in CH <sub>2</sub> -C(=O));<br>1666.48 (C=O <sub>st</sub> in CH <sub>2</sub> -C(=O...H), NH <sub>2δ</sub> );<br>1539.64 (NH <sub>2δ</sub> ); 1465.15 (CH <sub>2δ</sub> );<br>1325, 1200, 1070.46 (C-O <sub>st</sub> , C-N <sub>st</sub> in NH-C(-OH));<br>958.68; 799.85 (O-H <sub>δ</sub> ); 750 (N-H <sub>δ</sub> , CH <sub>2γ</sub> ) |                                                                                                                                                                                                                                                                                                                                                                                |                                                                                                                                                                                                                                                                                                                                                                                                                                                                                                                                                                                                                                                                                                                                                     |
| XPS, eV                    | 103.2 (SiO <sub>2</sub> , Si 2p, 19.5%);<br>285.7 (NCH <sub>2</sub> CH <sub>2</sub> CH <sub>2</sub> N, NCH <sub>2</sub> CH <sub>2</sub> O, OCH <sub>2</sub> CH <sub>2</sub> O,<br>OCH <sub>2</sub> CH <sub>2</sub> CH <sub>2</sub> Si, C 1s, 24.3%);<br>399.3 (NCH <sub>2</sub> CH <sub>2</sub> CH <sub>2</sub> N, NCH <sub>2</sub> CH <sub>2</sub> O, N 1s, 5.1%);<br>532.7 (OCH <sub>2</sub> CH <sub>2</sub> O, SiO <sub>2</sub> , H <sub>2</sub> O, O 1s, 51.1%)                                                                                                                                 |                                                                                                                                                                                                                                                                                                                                                                                | 285.8 (NCH <sub>2</sub> CH <sub>2</sub> CH <sub>2</sub> N, NCH <sub>2</sub> CH <sub>2</sub> O, OCH <sub>2</sub> CH <sub>2</sub> O,<br>OCH <sub>2</sub> CH <sub>2</sub> CH <sub>2</sub> Si, C 1s, 67.6%);<br>399.4 (NCH <sub>2</sub> CH <sub>2</sub> CH <sub>2</sub> N, NCH <sub>2</sub> CH <sub>2</sub> O, N 1s, 16.1%);<br>532.7 (OCH <sub>2</sub> CH <sub>2</sub> O, SiO <sub>2</sub> , H <sub>2</sub> O, O 1s, 16.3%)                                                                                                                                                                                                                                                                                                                            |
| <sup>13</sup> C NMR, δ ppm | 73.6 (-CH <sub>2</sub> CH <sub>2</sub> OCH <sub>2</sub> ); 66 (-CH <sub>2</sub> ) <sub>2</sub> CHOH);<br>58 (NCH <sub>2</sub> CH <sub>2</sub> CH <sub>2</sub> CH <sub>2</sub> N); 52.4 (NCH <sub>2</sub> CH <sub>2</sub> CH <sub>2</sub> N);<br>46 (NCH <sub>2</sub> CH <sub>2</sub> CH <sub>2</sub> NHCH <sub>2</sub> -); 38.5 (NCH <sub>2</sub> CH <sub>2</sub> CH <sub>2</sub> NH <sub>2</sub> );<br>23.6 (NCH <sub>2</sub> CH <sub>2</sub> CH <sub>2</sub> N); 18.5 (SiCH <sub>2</sub> CH <sub>2</sub> CH <sub>2</sub> O);<br>9.2 (SiCH <sub>2</sub> CH <sub>2</sub> CH <sub>2</sub> O)         | 86 (-OCH <sub>2</sub> N-); 74 (-CH <sub>2</sub> CH <sub>2</sub> O);<br>65 (-CH <sub>2</sub> ) <sub>2</sub> CHOH); 44<br>(NCH <sub>2</sub> CH <sub>2</sub> CH <sub>2</sub> N,<br>NCH <sub>2</sub> CH <sub>2</sub> CH <sub>2</sub> NHCH <sub>2</sub> -);<br>30 (NCH <sub>2</sub> CH <sub>2</sub> CH <sub>2</sub> N);<br>16 (SiCH <sub>2</sub> CH <sub>2</sub> CH <sub>2</sub> O) | 74 (-OCH <sub>2</sub> CH <sub>2</sub> OCH <sub>2</sub> ); 68 (-CH <sub>2</sub> ) <sub>2</sub> CHOH);<br>65 (SiCH <sub>2</sub> CH <sub>2</sub> CH <sub>2</sub> O); 53 (NCH <sub>2</sub> CH <sub>2</sub> CH <sub>2</sub> CH <sub>2</sub> N);<br>51 (NCH <sub>2</sub> CH <sub>2</sub> CH <sub>2</sub> N, NHCH <sub>2</sub> CH <sub>2</sub> O);<br>47 (NCH <sub>2</sub> CH <sub>2</sub> CH <sub>2</sub> NHCH <sub>2</sub> -); 38 (NCH <sub>2</sub> CH <sub>2</sub> CH <sub>2</sub> NH <sub>2</sub> );<br>22 (NCH <sub>2</sub> CH <sub>2</sub> CH <sub>2</sub> N, NCH <sub>2</sub> CH <sub>2</sub> CH <sub>2</sub> CH <sub>2</sub> N,<br>SiCH <sub>2</sub> CH <sub>2</sub> CH <sub>2</sub> O); 9.6 (SiCH <sub>2</sub> CH <sub>2</sub> CH <sub>2</sub> O) |

**Table S2.** Porosity properties of dendrimer-based hybrid materials according to nitrogen low temperature adsorption and desorption.

|                                                                            | G2-dendr-meso-SiO <sub>2</sub> | G3-dendr-SiO <sub>2</sub> |
|----------------------------------------------------------------------------|--------------------------------|---------------------------|
| Langmuir Surface Area, m <sup>2</sup> /g                                   | 179.0                          | 83.9                      |
| BET Surface Area, m <sup>2</sup> /g                                        | 118.5                          | 53.9                      |
| BJH Adsorption cumulative surface area (d: 17.0-30.0 Å), m <sup>2</sup> /g | 429.0                          | 52.1                      |
| BJH Adsorption cumulative volume (d: 17.0-30.0 Å), cm <sup>3</sup> /g      | 8.1                            | 0.2                       |
| BJH Adsorption average pore width, Å                                       | 75.3                           | 14.1                      |
| Nitrogen content, wt. %                                                    | 6.3                            | 4.6                       |

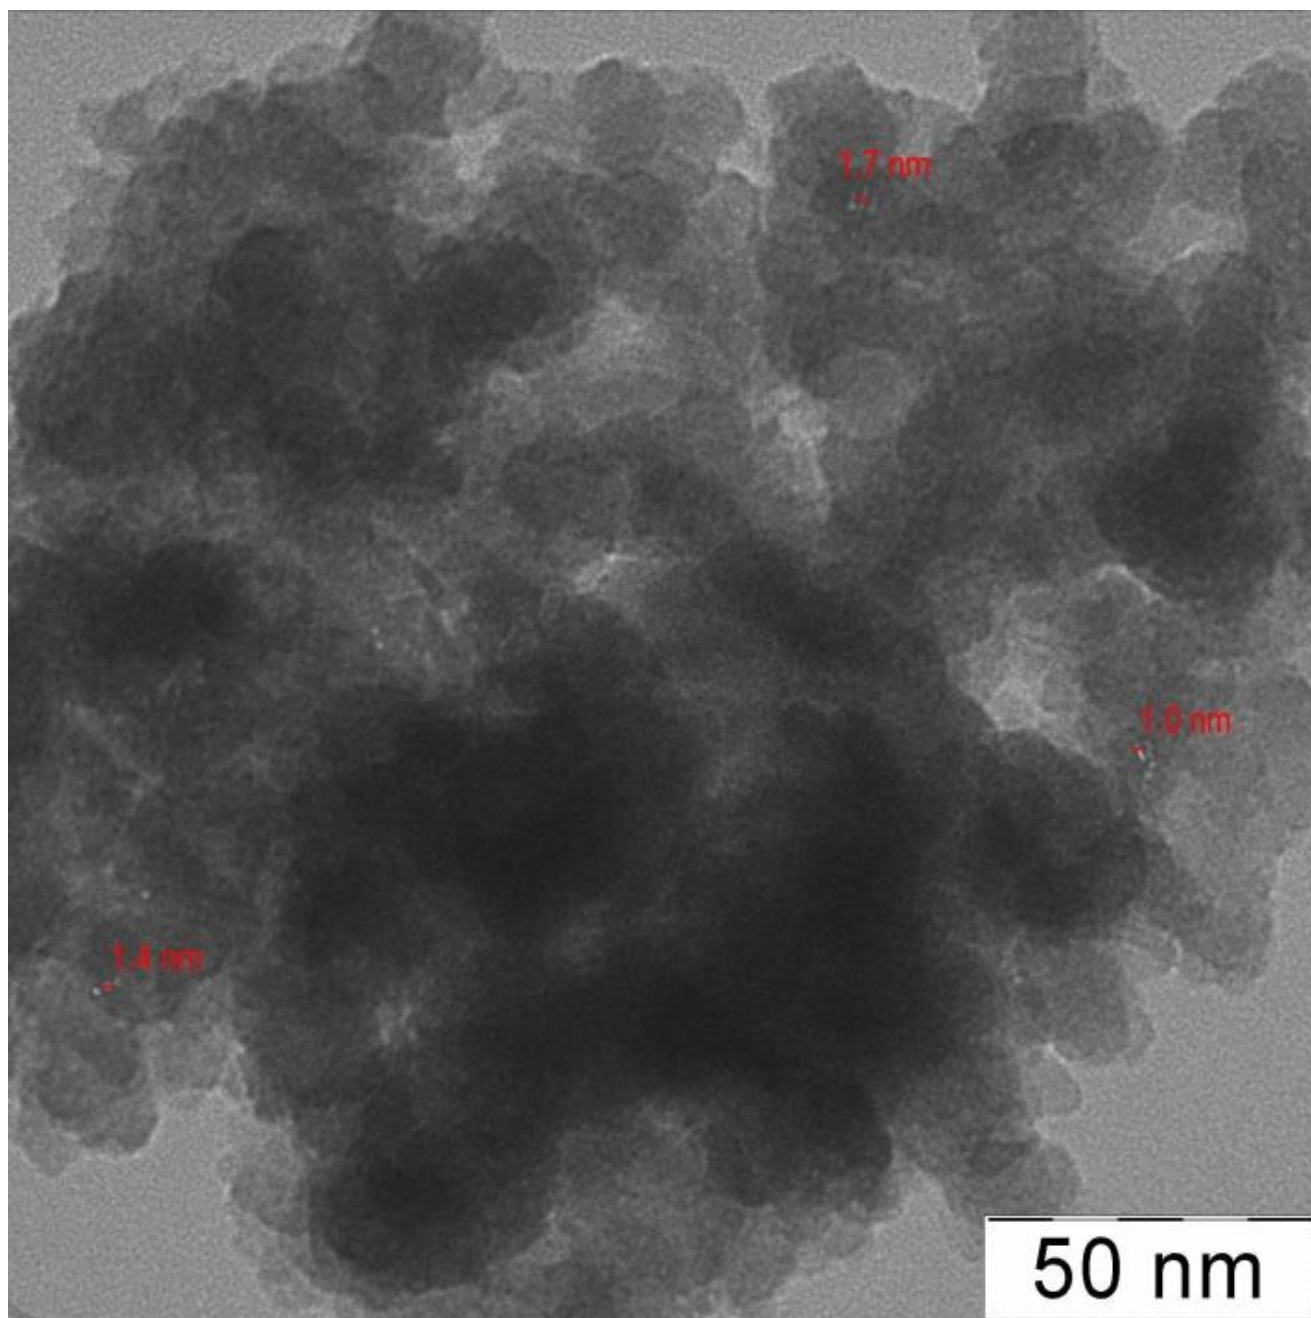

**Figure S1.** TEM image of hybrid G3-dendr-SiO<sub>2</sub> material.

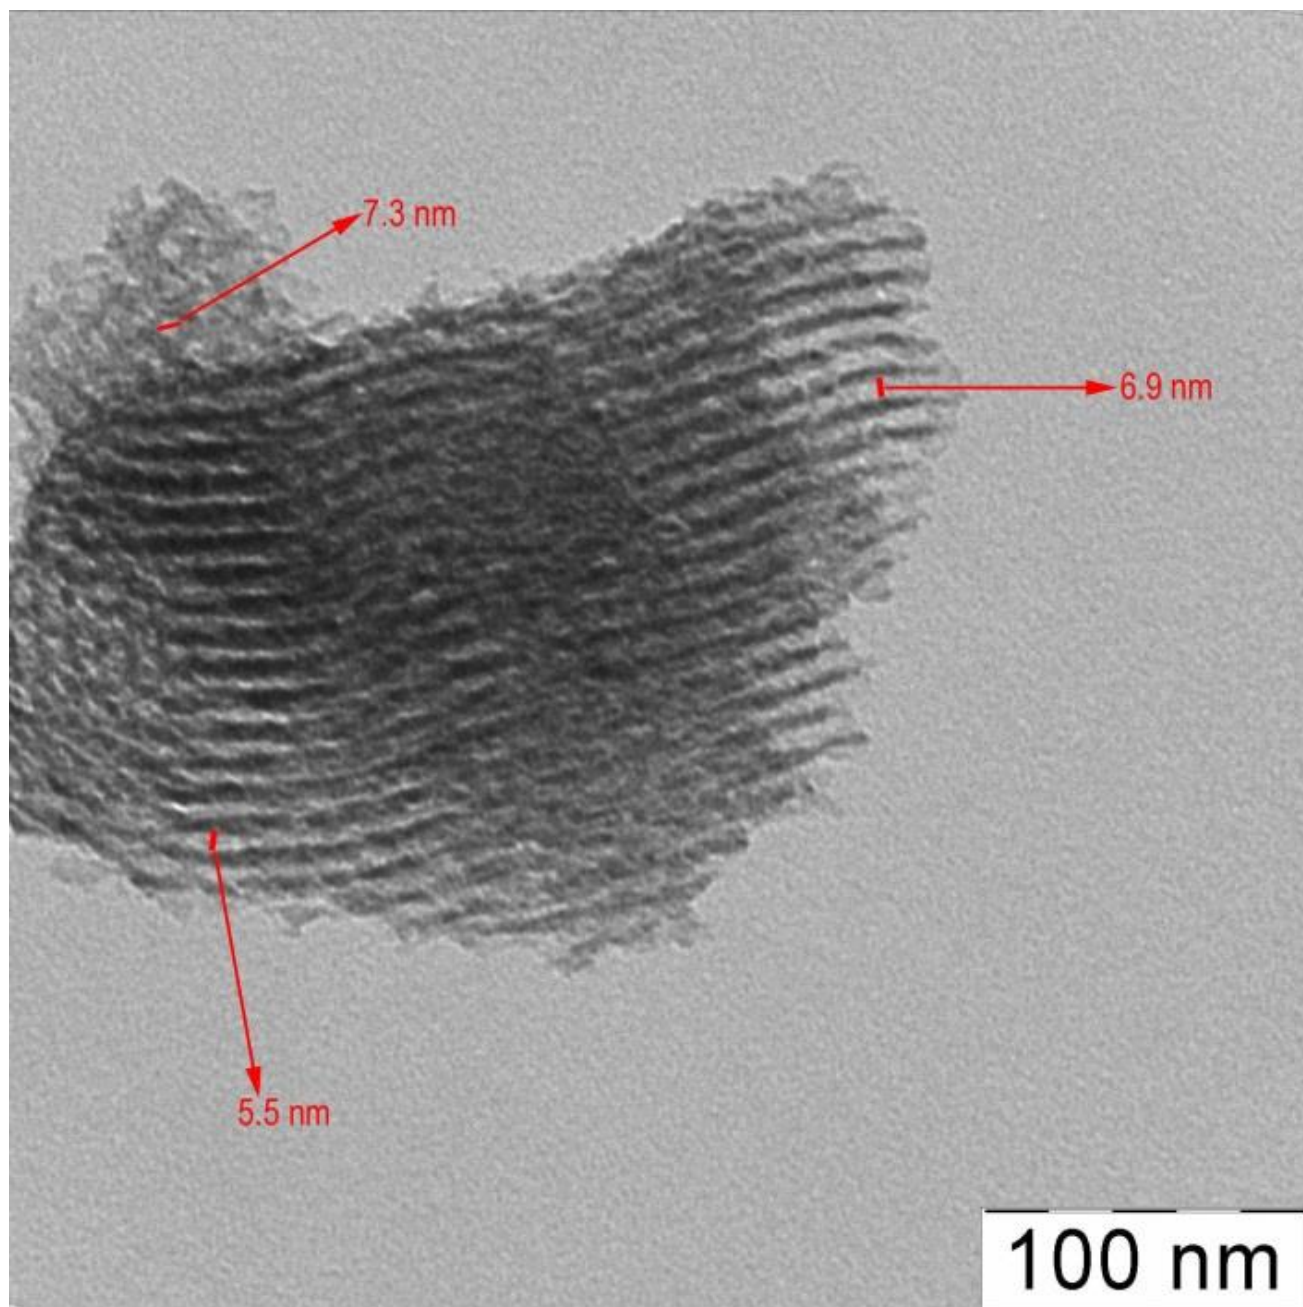

Figure S2. TEM image of hybrid G2-dendr-meso-SiO<sub>2</sub> material.

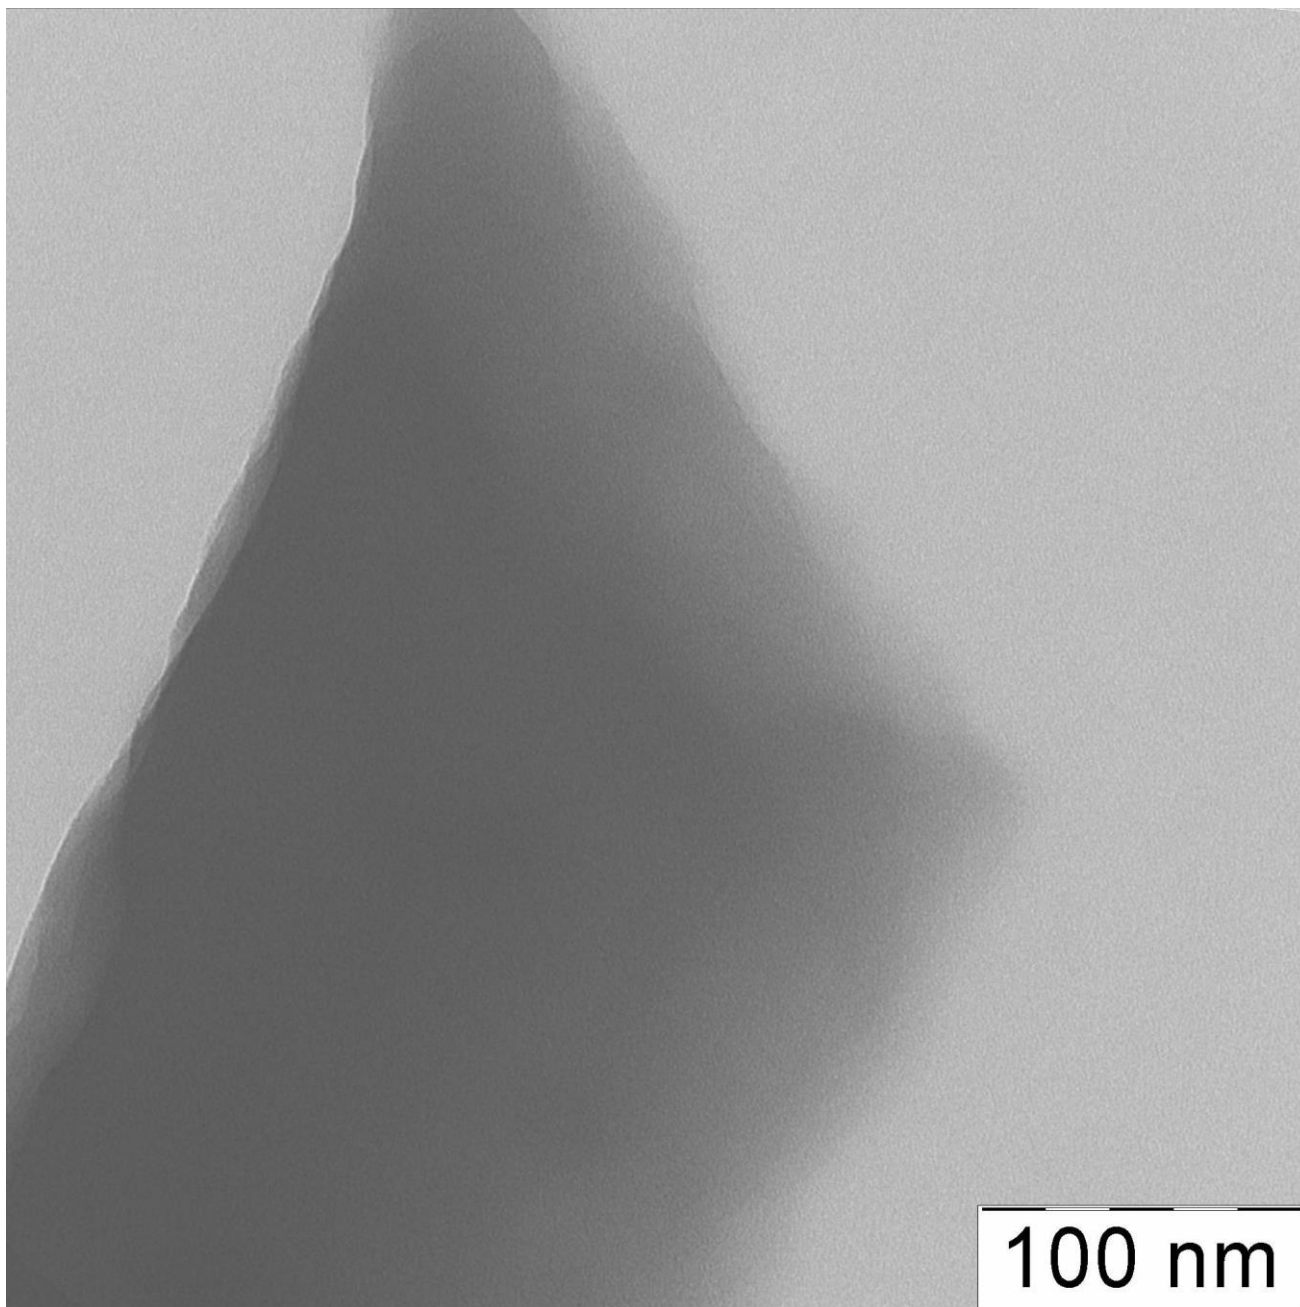

**Figure S3.** TEM image of hybrid *meso*-G2-dendr-Si material.

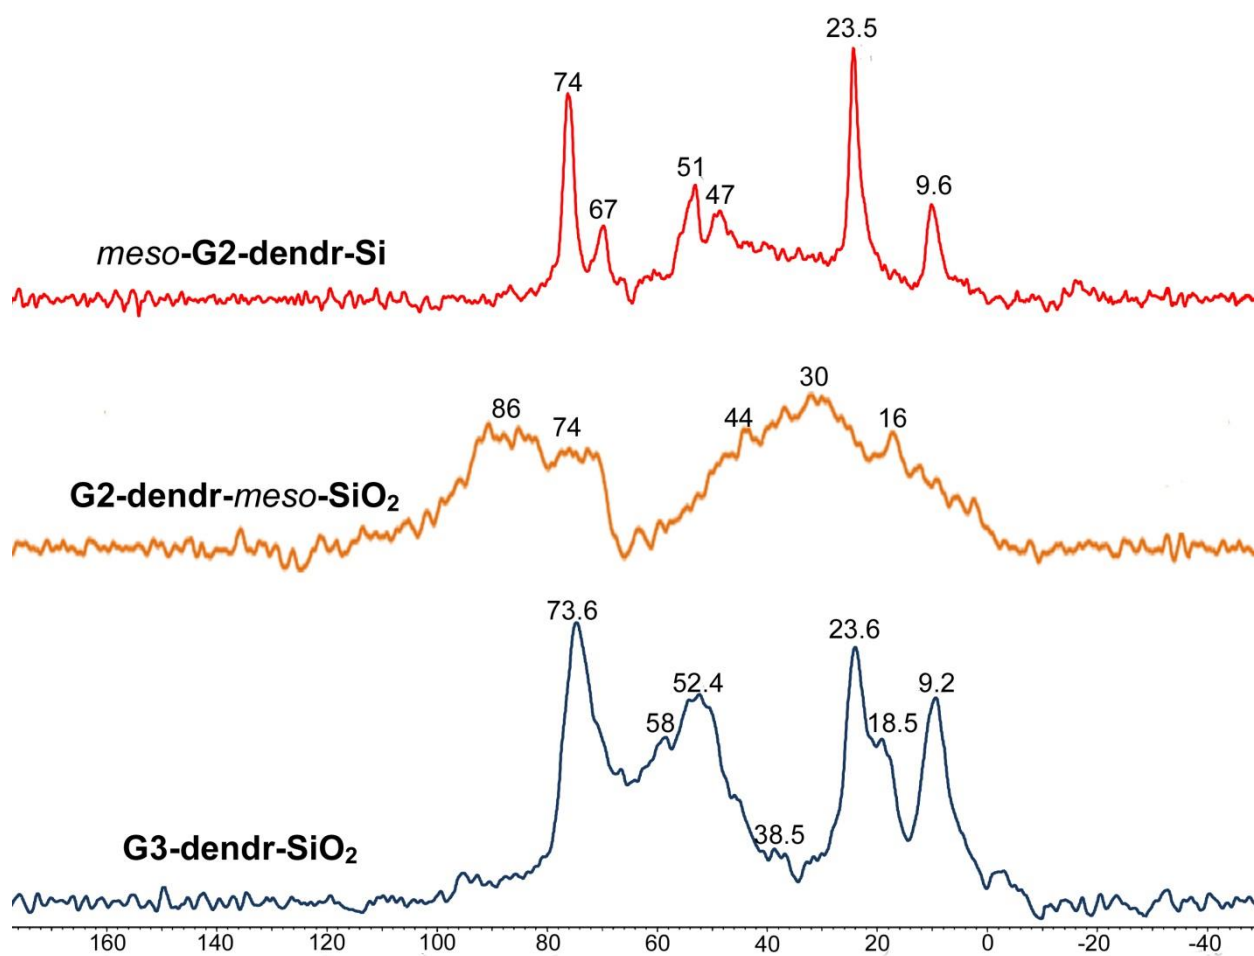

Figure S4.  $^{13}\text{C}$  MAS NMR spectra of dendrimer-based organo-silica carriers.

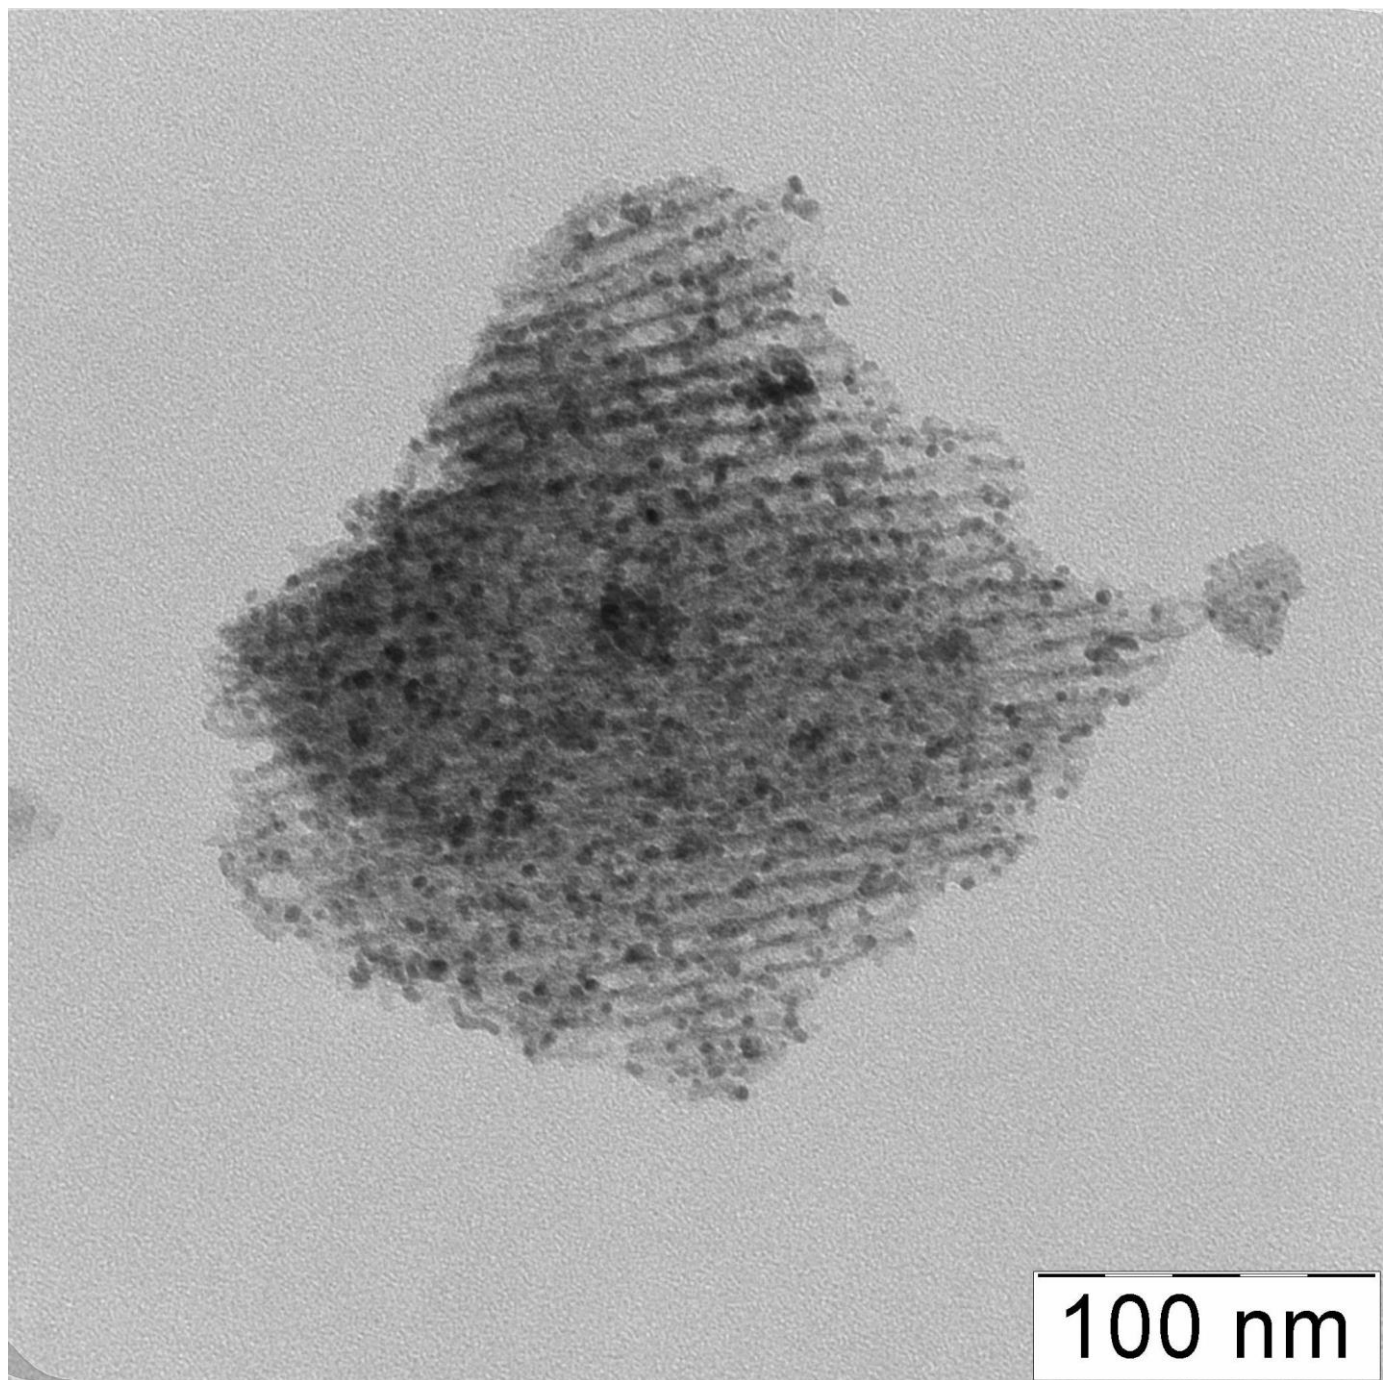

Figure S5. G2-dendr-meso-SiO<sub>2</sub>-Pd TEM image.



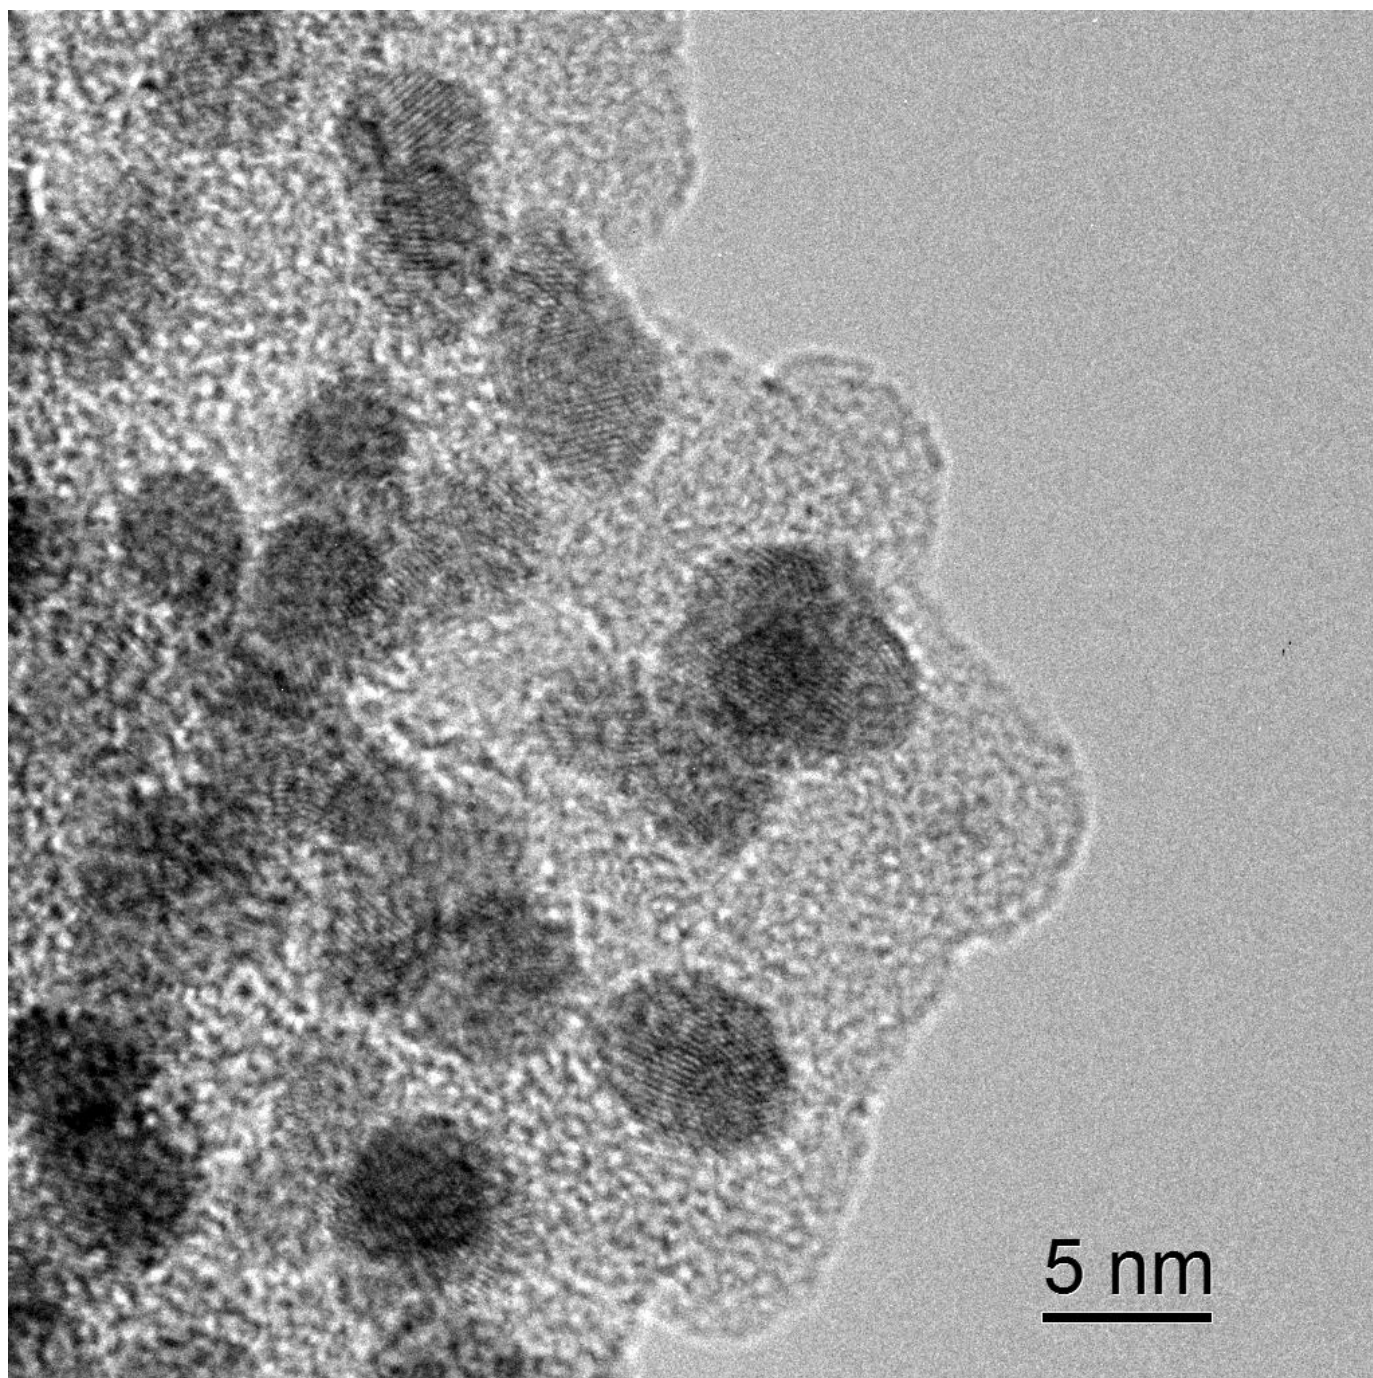

Figure S6. G2-dendr-*meso*-SiO<sub>2</sub>-Pd HRTEM image.

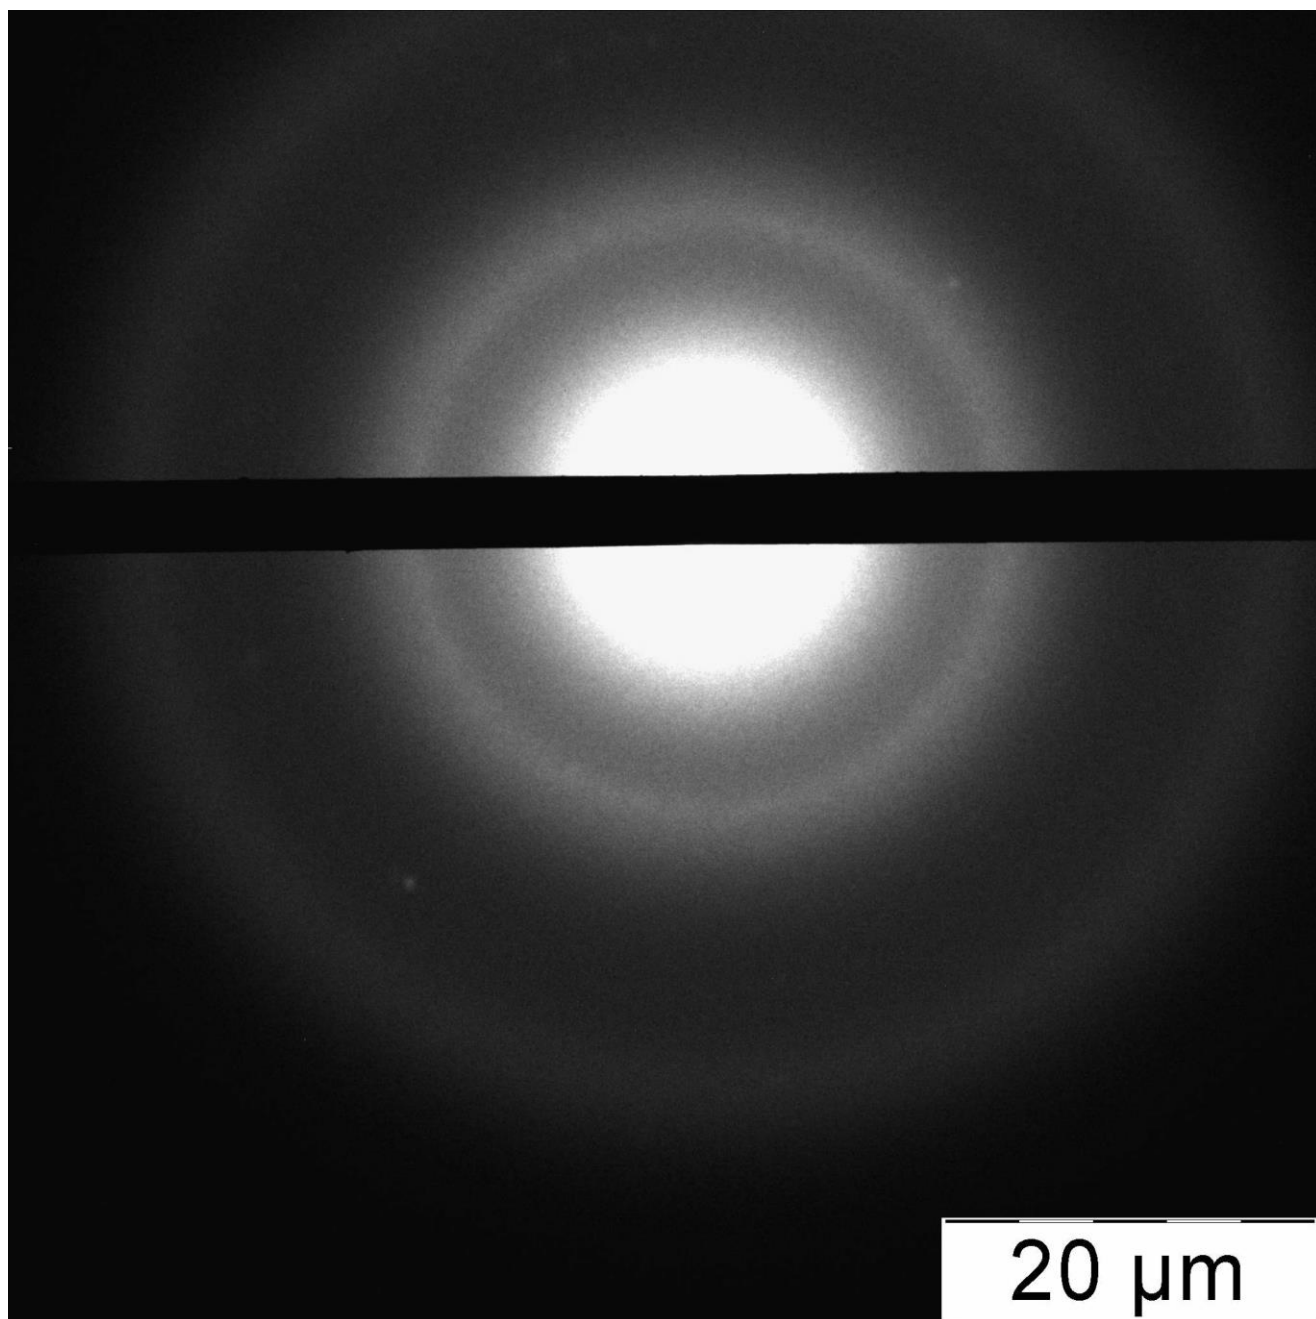

**Figure S7.** Electron diffraction pattern from G2-dendr-*meso*-SiO<sub>2</sub>-Pd sample.

| Table S3. <i>d</i> -spacings in the G2-dendr- <i>meso</i> -SiO <sub>2</sub> -Pd sample |              |                               |
|----------------------------------------------------------------------------------------|--------------|-------------------------------|
| R, px                                                                                  | <i>d</i> , Å | Reference [2]                 |
| 243                                                                                    | 4.225        | SiO <sub>2</sub> [100] quartz |
| 461                                                                                    | 2.227        | Pd [111]                      |
| 519                                                                                    | 1.98         | Pd [002]                      |
| 745                                                                                    | 1.378        | Pd [022]                      |
| 879                                                                                    | 1.168        | Pd [113]                      |
| 964                                                                                    | 1.065        | ~Pd [222] or PdO [123]        |

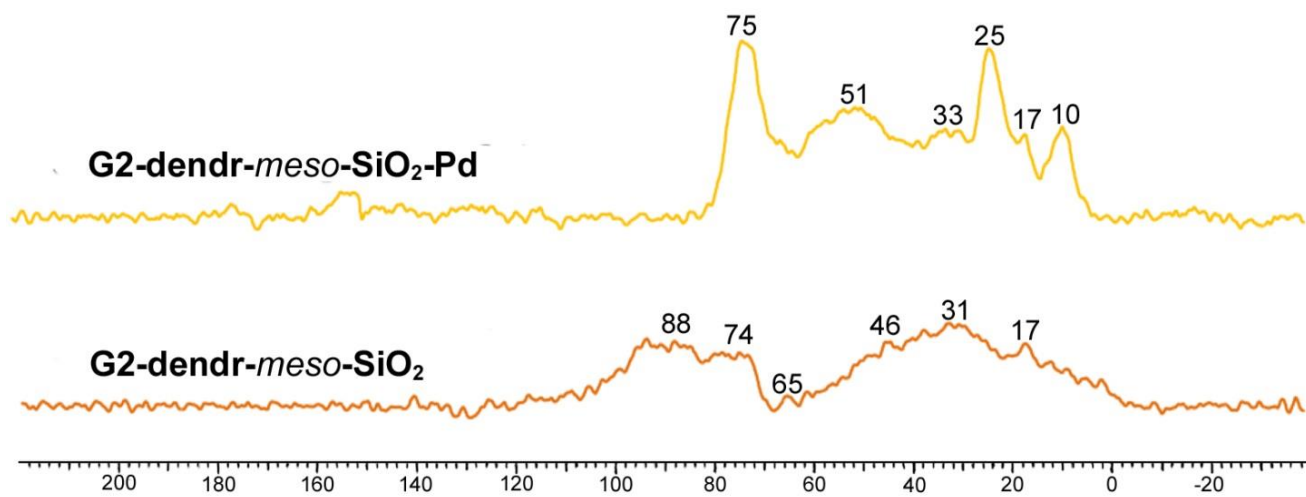

**Figure S8.**  $^{13}\text{C}$  MAS NMR spectra of G2-dendr-meso-SiO<sub>2</sub>-Pd catalyst and its carrier.

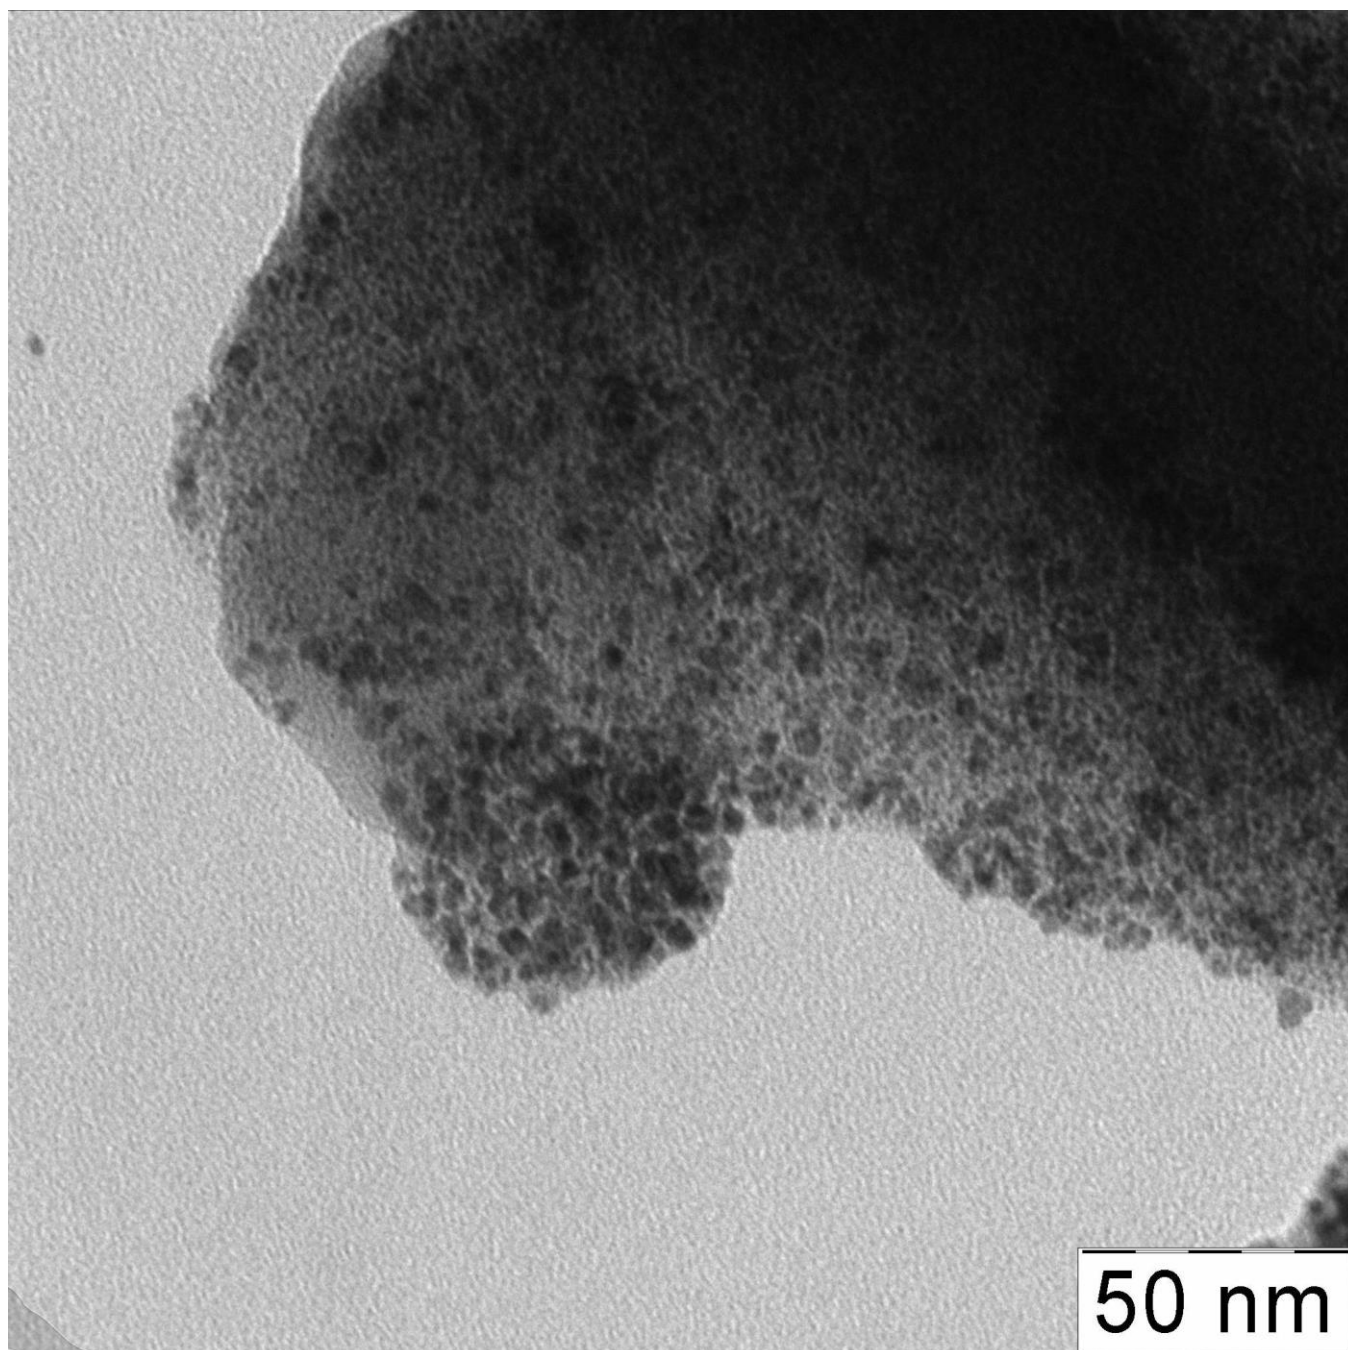

**Figure S9.** *Meso-G2-dendr-Si-Pd* TEM image.

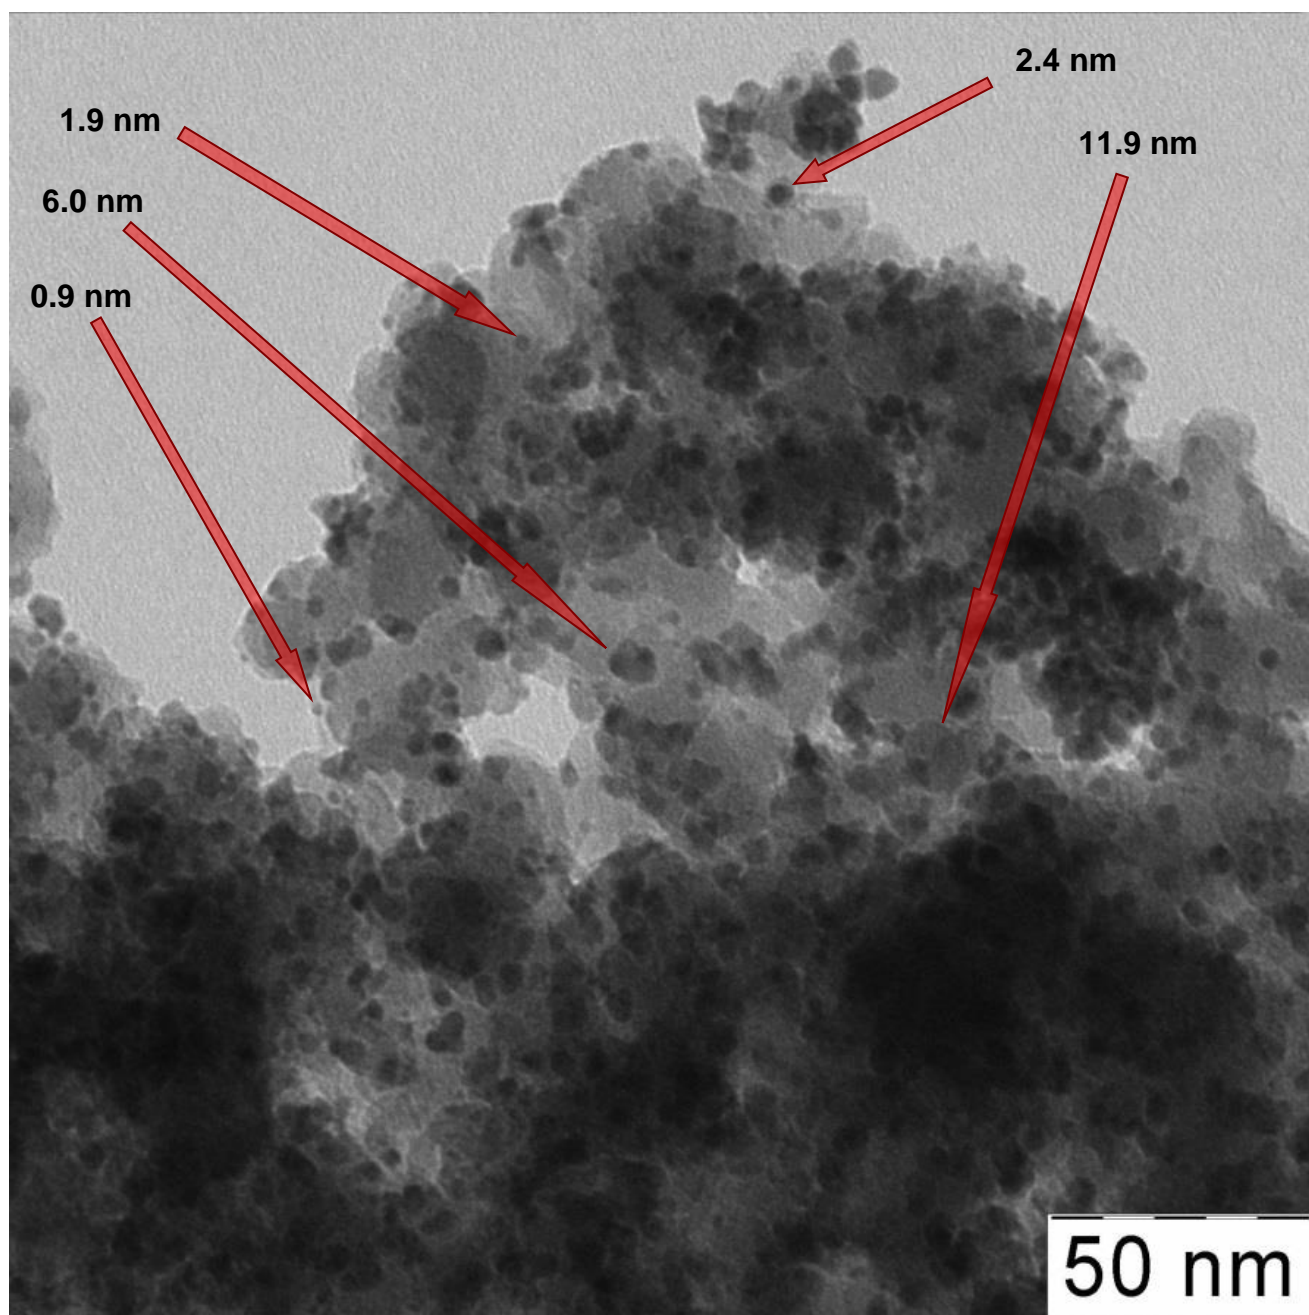

Figure S10. TEM image for G3-dendr-SiO<sub>2</sub>-Pd catalyst.

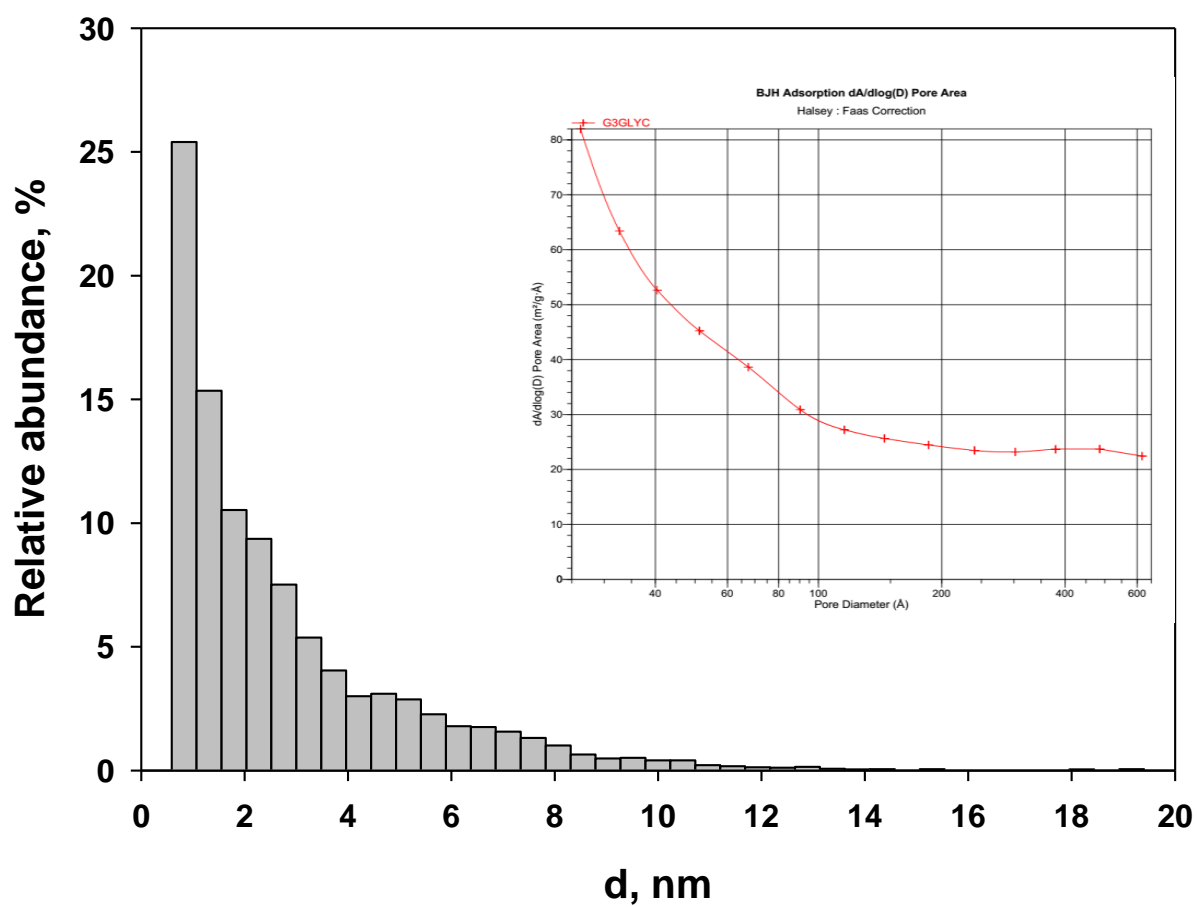

Figure S11. Particle size distribution and for G3-dendr-SiO<sub>2</sub>-Pd and pore size distribution for G3-dendr-SiO<sub>2</sub> carrier.

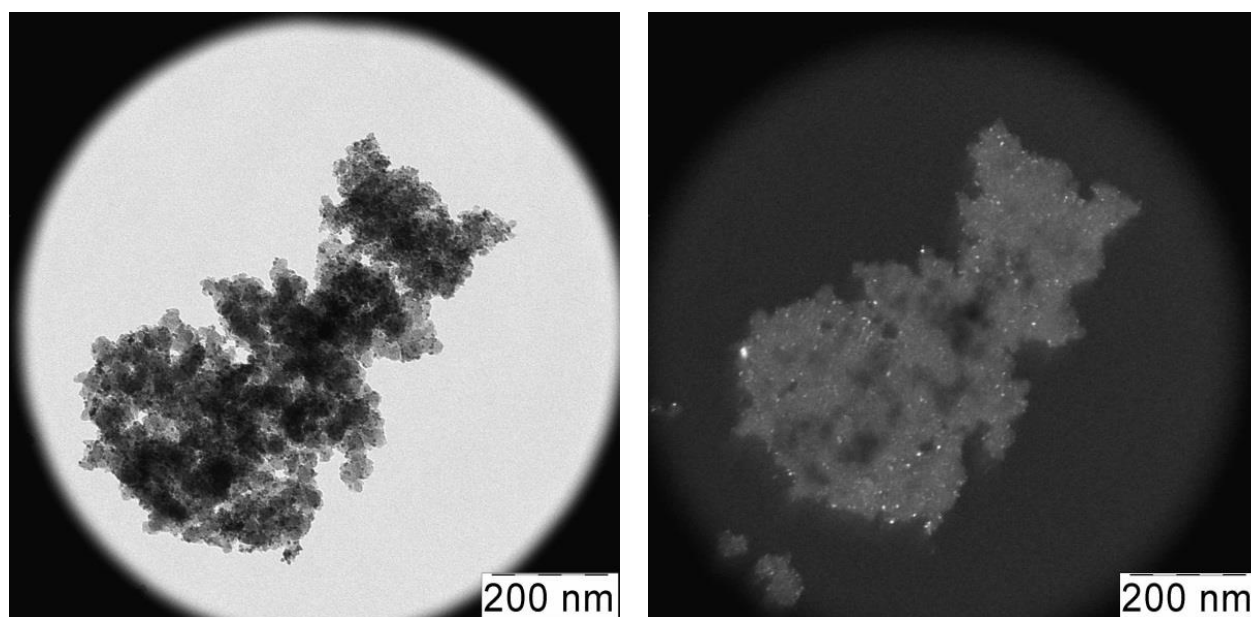

Figure S12. TEM image for G3-dendr-SiO<sub>2</sub>-Pd catalyst in the dark field.

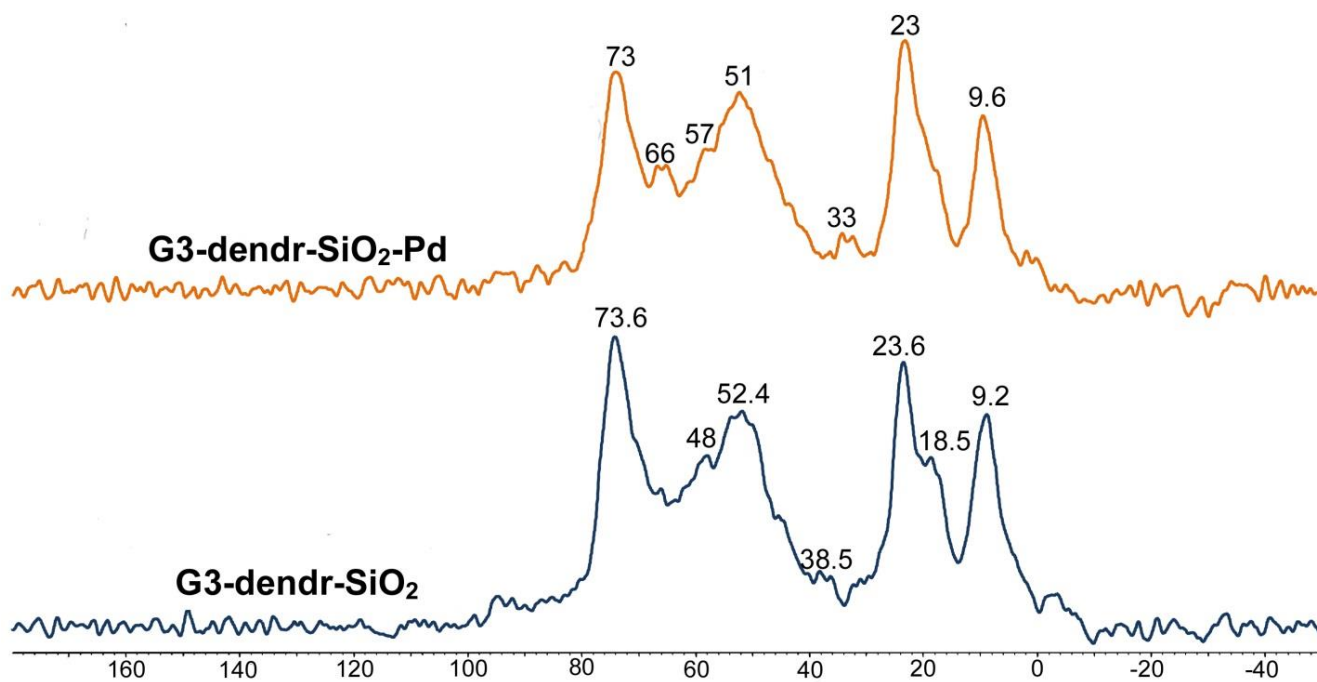

Figure S13.  $^{13}\text{C}$  MAS NMR spectra of G3-dendr-SiO<sub>2</sub>-Pd catalyst and its carrier.

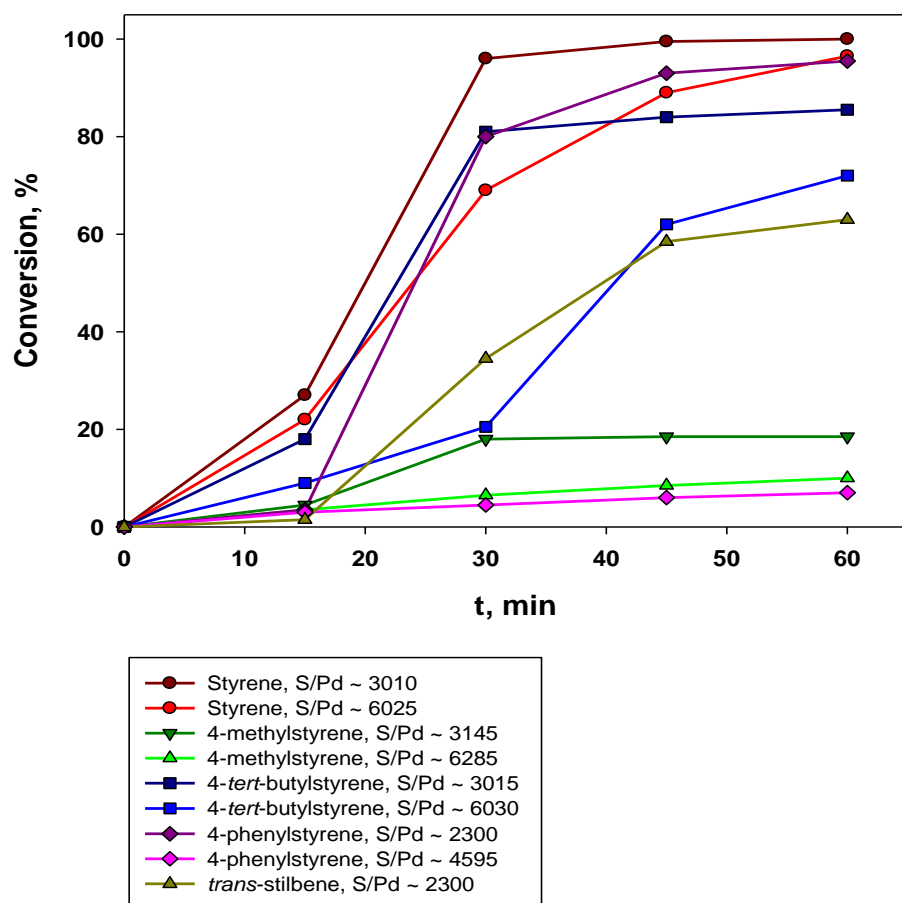

Figure S14. Hydrogenation of styrenes in the presence of *meso*-G2-dendr-Si-Pd catalyst. Reaction conditions are: 80 °C, 10 atm. of H<sub>2</sub>.

**Table S4.** Hydrogenation of 1-hexyne in the presence of the dendrimer-based organo-silica palladium catalysts <sup>[a]</sup>

| Entry | Catalyst                                    | Substrate/Pd, (mol/mol) | P (H <sub>2</sub> ), atm. | Conv., % | TOF, h <sup>-1</sup>                                                            | Products distribution, %                                                                                        |
|-------|---------------------------------------------|-------------------------|---------------------------|----------|---------------------------------------------------------------------------------|-----------------------------------------------------------------------------------------------------------------|
| 1     | G3-dendr-SiO <sub>2</sub> -Pd               | 6915                    | 10                        | 100      | 27650                                                                           | <b><i>n</i>-hexane 36%</b><br><b>1-hexene 15%</b><br><i>cis</i> -2-hexene 28%<br><i>trans</i> -2-hexene 21%     |
| 2     |                                             | 20740                   | 10                        | 100      | 82955                                                                           | <b><i>n</i>-hexane 23%</b><br><b>1-hexene 36%</b><br><i>cis</i> -2-hexene 24.5%<br><i>trans</i> -2-hexene 16.5% |
| 3     |                                             | 41480                   | 10                        | 91       | 150980                                                                          | <b><i>n</i>-hexane 9%</b><br><b>1-hexene 89%</b><br><i>cis</i> -2-hexene 1.5%<br><i>trans</i> -2-hexene 0.5%    |
| 4     |                                             | 103695                  | 10                        | 72.5     | 300720                                                                          | <b><i>n</i>-hexane 2.5%</b><br><b>1-hexene 97.5%</b>                                                            |
| 5     |                                             | 103695                  | 30                        | 97.5     | 404415                                                                          | <b><i>n</i>-hexane 7.5%</b><br><b>1-hexene 90%</b><br><i>cis</i> -2-hexene 2.5%                                 |
| 6     | G2-dendr- <i>meso</i> -SiO <sub>2</sub> -Pd | 5880                    | 10                        | 100      | 12220                                                                           | <b><i>n</i>-hexane 52.5%</b><br><b>1-hexene 15%</b><br><i>cis</i> -2-hexene 22%<br><i>trans</i> -2-hexene 10%   |
| 7     |                                             | 6110                    | 10                        | 99       | 24200                                                                           | <b><i>n</i>-hexane 32%</b><br><b>1-hexene 47.5%</b><br><i>cis</i> -2-hexene 16.5%<br><i>trans</i> -2-hexene 4%  |
| 8     |                                             | 12220                   | 10                        | 68       | 33240                                                                           | <b><i>n</i>-hexane 12%</b><br><b>1-hexene 81%</b><br><i>cis</i> -2-hexene 10%                                   |
| 9     |                                             | 12220                   | 30                        | 98       | 47905                                                                           | <b><i>n</i>-hexane 14.5%</b><br><b>1-hexene 73%</b><br><i>cis</i> -2-hexene 12%<br><i>trans</i> -2-hexene 0.5%  |
| 10    |                                             | 18330                   | 10                        | 23       | 16865                                                                           | <b><i>n</i>-hexane 4.5%</b><br><b>1-hexene 94%</b><br><i>cis</i> -2-hexene 1.5%                                 |
| 11    |                                             | 18330                   | 30                        | 93       | 68195                                                                           | <b><i>n</i>-hexane 9%</b><br><b>1-hexene 86.5%</b><br><i>cis</i> -2-hexene 4%<br><i>trans</i> -2-hexene 0.5%    |
| 12    |                                             | 36660                   | 30                        | 87       | 127585                                                                          | <b><i>n</i>-hexane 7.5%</b><br><b>1-hexene 91%</b><br><i>cis</i> -2-hexene 1.5%                                 |
| 13    | 91660                                       | 30                      | 75.5                      | 276805   | <b><i>n</i>-hexane 6%</b><br><b>1-hexene 93.5%</b><br><i>cis</i> -2-hexene 0.5% |                                                                                                                 |
| 14    | <i>meso</i> -G2-dendr-Si-Pd                 | 6010                    | 10                        | 97.5     | 23430                                                                           | <b><i>n</i>-hexane 15%</b><br><b>1-hexene 80%</b><br><i>cis</i> -2-hexene 3.5%<br><i>trans</i> -2-hexene 1.5%   |
| 15    |                                             | 18020                   | 10                        | 95       | 68485                                                                           | <b><i>n</i>-hexane 12%</b><br><b>1-hexene 83%</b><br><i>cis</i> -2-hexene 5%                                    |
| 16    |                                             | 24030                   | 10                        | 61.5     | 59115                                                                           | <b><i>n</i>-hexane 10%</b><br><b>1-hexene 86.5%</b><br><i>cis</i> -2-hexene 3.5%                                |
| 17    |                                             | 36045                   | 10                        | 27       | 38930                                                                           | <b><i>n</i>-hexane 6.5%</b><br><b>1-hexene 92%</b><br><i>cis</i> -2-hexene 1.5%                                 |
| 18    |                                             | 36045                   | 30                        | 82       | 118225                                                                          | <b><i>n</i>-hexane 9.5%</b><br><b>1-hexene 86%</b><br><i>cis</i> -2-hexene 4.5%                                 |
| 19    |                                             | 90110                   | 30                        | 65       | 234290                                                                          | <b><i>n</i>-hexane 8%</b><br><b>1-hexene 89.5%</b><br><i>cis</i> -2-hexene 2.5%                                 |

[a] Reaction conditions are: 0.5 mg of catalyst, 80 °C, 15 min.



**Table S5.** Hydrogenation of 1-octyne in the presence of the dendrimer-based organo-silica palladium catalysts <sup>[a]</sup>

| Entry | Catalyst                                    | Catalyst loading, mg | Substrate/Pd, (mol/mol) | P (H <sub>2</sub> ), atm. | Conv., % | TOF, h <sup>-1</sup> | Product distribution, %                                                                                                                            |
|-------|---------------------------------------------|----------------------|-------------------------|---------------------------|----------|----------------------|----------------------------------------------------------------------------------------------------------------------------------------------------|
| 1     | G3-dendr-SiO <sub>2</sub> -Pd               | 0.5                  | 5455                    | 10                        | 100      | 21535                | <b><i>n</i>-octane 42.5%</b><br><b>1-octene 5.5%</b><br><i>cis</i> -2-octene 30%<br><i>trans</i> -2-octene 16.5%<br>3-octene 5.5%<br>4-octene 1.5% |
| 2     |                                             | 0.5                  | 16365                   | 10                        | 100      | 64600                | <b><i>n</i>-octane 33%</b><br><b>1-octene 21%</b><br><i>cis</i> -2-octene 25%<br><i>trans</i> -2-octene 17.5%<br>3-octene 2.5%<br>4-octene 1%      |
| 3     |                                             | 0.5                  | 32735                   | 10                        | 100      | 129200               | <b><i>n</i>-octane 26%</b><br><b>1-octene 36.5%</b><br><i>cis</i> -2-octene 21%<br><i>trans</i> -2-octene 15%<br>3-octene 2%<br>4-octene 0.5%      |
| 4     |                                             | 0.5                  | 80750                   | 10                        | 98       | 316545               | <b><i>n</i>-octane 2%</b><br><b>1-octene 93.5%</b><br><i>cis</i> -2-octene 4%<br><i>trans</i> -2-octene 0.5%                                       |
| 5     | G2-dendr- <i>meso</i> -SiO <sub>2</sub> -Pd | 1                    | 2380                    | 10                        | 100      | 9515                 | <b><i>n</i>-octane 50%</b><br><b>1-octene 2%</b><br><i>cis</i> -2-octene 25.5%<br><i>trans</i> -2-octene 18.5%<br>3-octene 3%<br>4-octene 1%       |
| 6     |                                             | 0.5                  | 4760                    | 10                        | 100      | 19035                | <b><i>n</i>-octane 44%</b><br><b>1-octene 1.5%</b><br><i>cis</i> -2-octene 21%<br><i>trans</i> -2-octene 17.5%<br>3-octene 10.5%<br>4-octene 5.5%  |
| 7     |                                             | 0.5                  | 14275                   | 10                        | 96.5     | 55100                | <b><i>n</i>-octane 4.5%</b><br><b>1-octene 93%</b><br><i>cis</i> -2-octene 1%<br><i>trans</i> -2-octene 0.5%<br>3-octene 0.5%<br>4-octene 0.5%     |
| 8     |                                             | 0.5                  | 28550                   | 10                        | 64.5     | 73660                | <b>1-octene 97%</b><br><i>cis</i> -2-octene 1.5%<br><i>trans</i> -2-octene <1%<br>3-octene 0.5%<br>4-octene < 0.5%                                 |
| 9     |                                             | 0.5                  | 28550                   | 30                        | 89       | 101640               | <b><i>n</i>-octane 4.5%</b><br><b>1-octene 87%</b><br><i>cis</i> -2-octene 4.5%<br><i>trans</i> -2-octene 3%<br>3-octene 0.5%<br>4-octene 0.5%     |
| 10    |                                             | 0.5                  | 71375                   | 30                        | 60       | 171305               | <b><i>n</i>-octane 3.5%</b><br><b>1-octene 94%</b><br><i>cis</i> -2-octene 1.5%<br>3-octene 0.5%<br>4-octene 0.5%                                  |
| 11    | <i>meso</i> -G2-dendr-Si-Pd                 | 0.5                  | 4680                    | 10                        | 79       | 14785                | <b><i>n</i>-octane 13.5%</b><br><b>1-octene 78%</b><br><i>cis</i> -2-octene 4%<br><i>trans</i> -2-octene 4%<br>3-octene 0.5%                       |
| 12    |                                             | 0.5                  | 14035                   | 10                        | 61       | 34245                | <b><i>n</i>-octane 1%</b><br><b>1-octene 87%</b><br><i>cis</i> -2-octene 9%<br><i>trans</i> -2-octene 2.5%<br>3-octene 0.5%                        |
| 13    |                                             | 0.5                  | 14035                   | 30                        | 99       | 55575                | <b><i>n</i>-octane 7%</b><br><b>1-octene 90%</b><br><i>cis</i> -2-octene 1.5%<br><i>trans</i> -2-octene 1.5%                                       |
| 14    |                                             | 0.5                  | 28070                   | 30                        | 99.5     | 111715               | <b><i>n</i>-octane 6.5%</b><br><b>1-octene 91.5%</b><br><i>cis</i> -2-octene 1.5%<br><i>trans</i> -2-octene 0.5%                                   |
| 15    |                                             | 0.5                  | 70170                   | 30                        | 75.5     | 211920               | <b><i>n</i>-octane 6%</b>                                                                                                                          |

**1-octene 93%**  
*cis*-2-octene 1%

[a] Reaction conditions are: 80 °C, 15 min.

**Table S6.** Hydrogenation of 4-octyne in the presence of the dendrimer-based organo-silica palladium catalysts <sup>[a]</sup>

| Entry | Catalyst                                    | Substrate/Pd,<br>(mol/mol) | P (H <sub>2</sub> ),<br>atm. | Conv., % | TOF, h <sup>-1</sup> | Products distribution, %                                                                                                         |
|-------|---------------------------------------------|----------------------------|------------------------------|----------|----------------------|----------------------------------------------------------------------------------------------------------------------------------|
| 1     | G3-dendr-SiO <sub>2</sub> -Pd               | 5410                       | 10                           | 100      | 21650                | <b><i>n</i>-octane 71.5%</b><br><i>cis</i> -2-octene 10.5%<br><i>trans</i> -2-octene 3.5%<br>3-octene 9.5%<br><b>4-octene 5%</b> |
| 2     |                                             | 16235                      | 10                           | 100      | 64945                | <b><i>n</i>-octane 61.5%</b><br><i>cis</i> -2-octene 2.5%<br><i>trans</i> -2-octene 1%<br>3-octene 14%<br><b>4-octene 21%</b>    |
| 3     |                                             | 32475                      | 10                           | 93.5     | 121450               | <b><i>n</i>-octane 51.5%</b><br><i>cis</i> -2-octene 0.5%<br><i>trans</i> -2-octene 0.5%<br>3-octene 5.5%<br><b>4-octene 42%</b> |
| 4     |                                             | 81185                      | 10                           | 10       | 32475                | <b><i>n</i>-octane 26%</b><br><i>cis</i> -2-octene 3%<br><i>trans</i> -2-octene 0.5%<br>3-octene 10%<br><b>4-octene 60.5%</b>    |
| 5     |                                             | 81185                      | 30                           | 60       | 194840               | <b><i>n</i>-octane 35.5%</b><br><i>cis</i> -2-octene 0.5%<br>3-octene 4.5%<br><b>4-octene 60%</b>                                |
| 6     | G2-dendr- <i>meso</i> -SiO <sub>2</sub> -Pd | 7175                       | 10                           | 99.5     | 28560                | <b><i>n</i>-octane 73.5%</b><br><i>cis</i> -2-octene 9%<br><i>trans</i> -2-octene 13%<br>3-octene 3%<br><b>4-octene 1.5%</b>     |
| 7     |                                             | 14350                      | 10                           | 99.5     | 57120                | <b><i>n</i>-octane 72%</b><br><i>cis</i> -2-octene 5.5%<br><i>trans</i> -2-octene 3%<br>3-octene 15.5%<br><b>4-octene 4%</b>     |
| 8     |                                             | 28705                      | 10                           | 54       | 62000                | <b><i>n</i>-octane 52%</b><br><i>cis</i> -2-octene 0.5%<br>3-octene 0.5%<br><b>4-octene 47%</b>                                  |
| 9     |                                             | 28705                      | 30                           | 98       | 112515               | <b><i>n</i>-octane 79.5%</b><br><i>cis</i> -2-octene 1%<br>3-octene 6.5%<br><b>4-octene 13%</b>                                  |
| 10    |                                             | 71760                      | 30                           | 85       | 243980               | <b><i>n</i>-octane 63.5%</b><br><i>cis</i> -2-octene 0.5%<br>3-octene 4.5%<br><b>4-octene 31.5%</b>                              |
| 11    | <i>meso</i> -G2-dendr-Si-Pd                 | 4705                       | 10                           | 96       | 18060                | <b><i>n</i>-octane 67.5%</b><br><i>cis</i> -2-octene 8%<br><i>trans</i> -2-octene 3%<br>3-octene 5.5%<br><b>4-octene 16%</b>     |
| 12    |                                             | 9405                       | 10                           | 78       | 29350                | <b><i>n</i>-octane 65.5%</b><br><i>cis</i> -2-octene 1%<br><i>trans</i> -2-octene 0.5%<br>3-octene 4.5%<br><b>4-octene 29%</b>   |
| 13    |                                             | 14110                      | 10                           | 42       | 23705                | <b><i>n</i>-octane 59%</b><br><i>cis</i> -2-octene 0.5%<br>3-octene 4%<br><b>4-octene 36.5%</b>                                  |
| 14    |                                             | 14110                      | 30                           | 58       | 32735                | <b><i>n</i>-octane 68.5%</b><br><i>cis</i> -2-octene 3%<br><i>trans</i> -2-octene 0.5%<br>3-octene 3.5%<br><b>4-octene 24.5%</b> |

[a] Reaction conditions are: 0.5 mg of catalyst, 80 °C, 15 min.

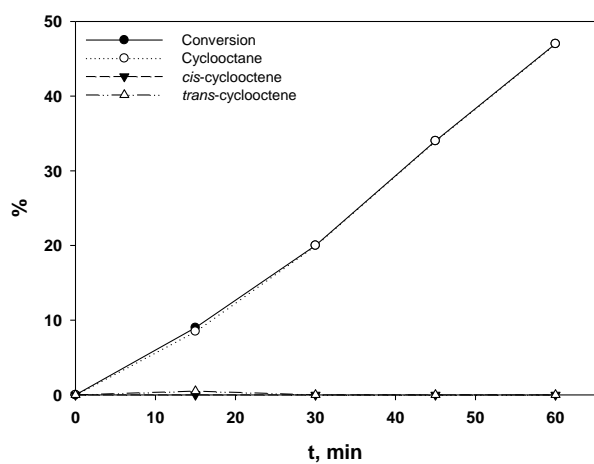

**Figure S15.** Hydrogenation of 1,3-cyclooctadiene in the presence of G3-dendr-SiO<sub>2</sub>-Pd catalyst. Reaction conditions are: 250  $\mu$ L of substrate, 1 mg of catalyst (S/Pd ~ 3190), 80  $^{\circ}$ C, 10 atm. of H<sub>2</sub>.

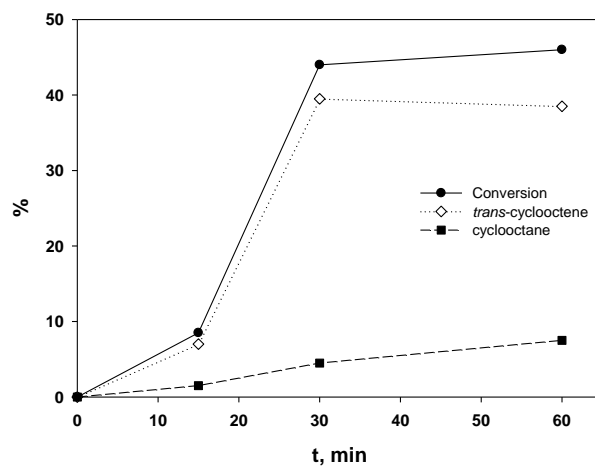

**Figure S16.** Hydrogenation of 1,3-cyclooctadiene in the presence of *meso*-G2-dendr-Si-Pd catalyst. Reaction conditions are: 250  $\mu$ L of substrate, 1 mg of catalyst (S/Pd ~ 2770), 80  $^{\circ}$ C, 10 atm. of H<sub>2</sub>.

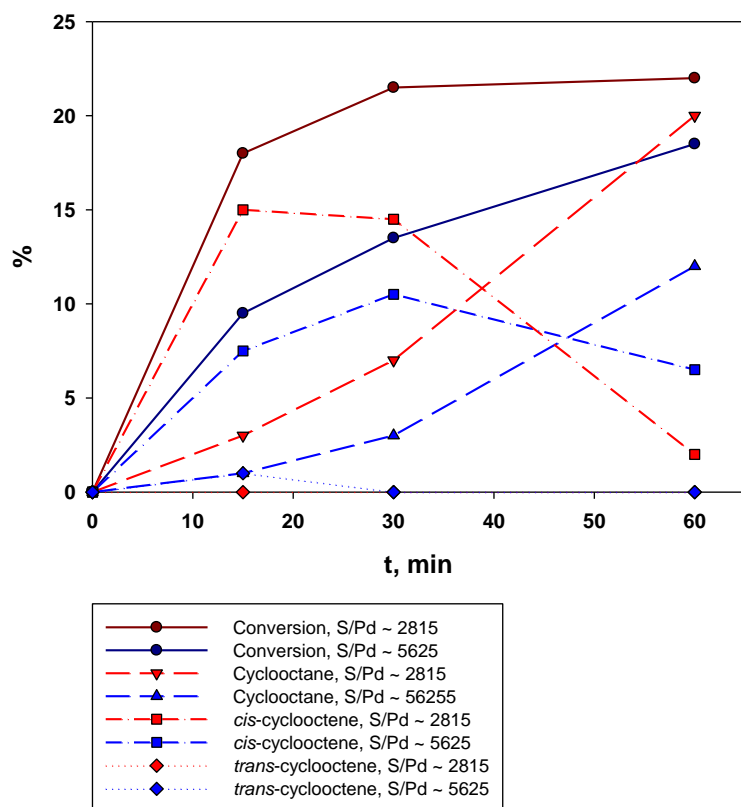

**Figure S17.** Hydrogenation of 1,5-cyclooctadiene in the presence of *meso*-G2-dendr-Si-Pd catalyst. Reaction conditions: 80  $^{\circ}$ C, 10 atm. of H<sub>2</sub>.

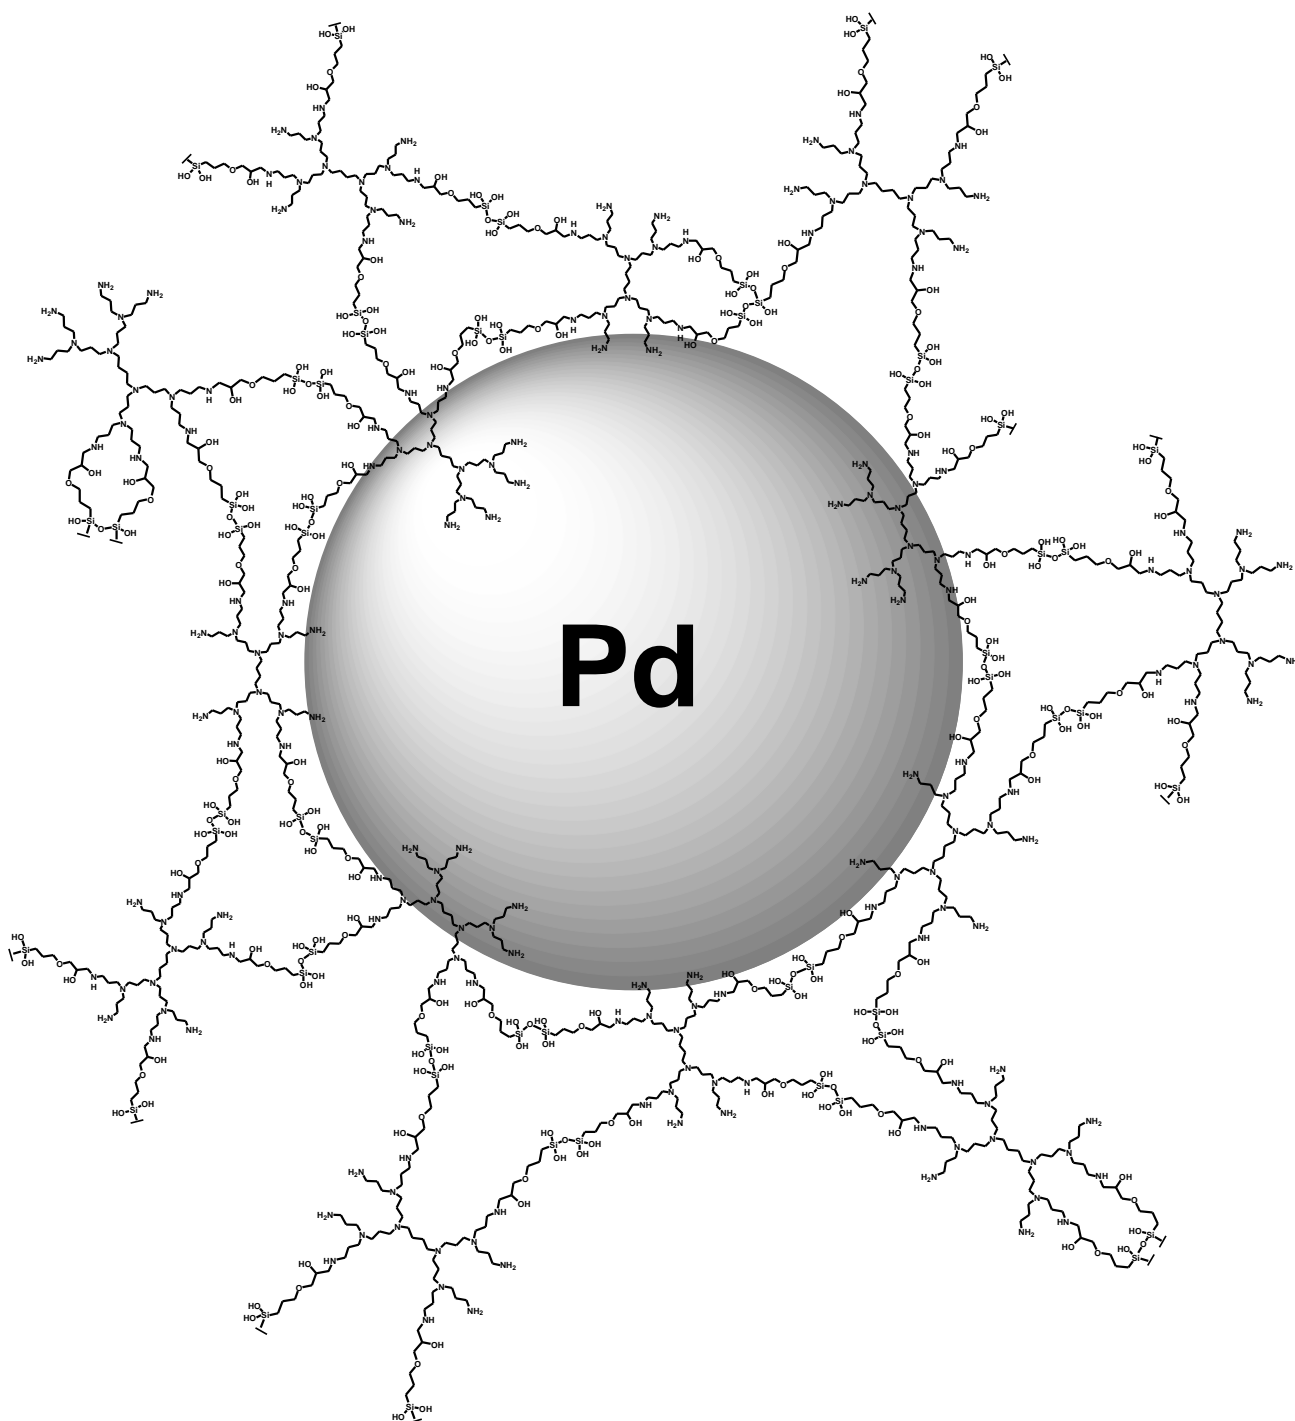

**Figure S18.** A proposed structure of *meso*-G2-dendr-Si-Pd catalyst.

**Table S7.** Hydrogenation of dienes in the presence of G2-dendr-*meso*-SiO<sub>2</sub>-Pd catalyst <sup>[a]</sup>

| Entry | Substrate                  | Catalyst loading, mg | Substrate/Pd (mol/mol) | P (H <sub>2</sub> ), atm. | Conv., % | TOF, h <sup>-1</sup> | Product distribution, %                                                                                                                     |
|-------|----------------------------|----------------------|------------------------|---------------------------|----------|----------------------|---------------------------------------------------------------------------------------------------------------------------------------------|
| 1     | 1,3-cyclooctadiene         | 1                    | 2820                   | 10                        | 23       | 2595                 | Cyclooctane 100%                                                                                                                            |
| 2     | 1,5-cyclooctadiene         | 1                    | 2860                   | 10                        | 33.5     | 3835                 | Cyclooctane 100%<br>(substrate isomerization of 100%)                                                                                       |
| 3     | 1,3-cyclohexadiene         | 0.5                  | 14735                  | 10                        | 96       | 56585                | Cyclohexene 96%<br>Cyclohexane 4%                                                                                                           |
| 4     |                            | 0.5                  | 29470                  | 10                        | 94       | 110810               | Cyclohexene 98%<br>Cyclohexane 2%                                                                                                           |
| 5     |                            | 0.5                  | 58940                  | 10                        | 72       | 169750               | Cyclohexene 99.5%<br>Cyclohexane 0.5%                                                                                                       |
| 6     |                            | 0.5                  | 58940                  | 30                        | 99.5     | 234585               | Cyclohexene 94.5%<br>Cyclohexane 5.5%                                                                                                       |
| 7     |                            | 0.5                  | 147350                 | 10                        | 58       | 227905               | Cyclohexene > 99.5%<br>Cyclohexane < 0.5%                                                                                                   |
| 8     |                            | 0.5                  | 147350                 | 30                        | 77       | 302560               | Cyclohexene 98.5%<br>Cyclohexane 1.5%                                                                                                       |
| 9     | 2,5-dimethyl-2,4-hexadiene | 0.5                  | 9850                   | 10                        | 100      | 39390                | 2,5-dimethyl-2-hexene 16.5%<br>2,5-dimethylhexane 4%<br>2,5-dimethyl- <i>cis</i> -3-hexene 4%<br>2,5-dimethyl- <i>trans</i> -3-hexene 75.5% |
| 10    |                            | 0.5                  | 14770                  | 10                        | 99.5     | 58795                | 2,5-dimethyl-2-hexene 18%<br>2,5-dimethylhexane 1.5%<br>2,5-dimethyl- <i>cis</i> -3-hexene 5.5%<br>2,5-dimethyl- <i>trans</i> -3-hexene 75% |
| 11    |                            | 0.5                  | 19695                  | 10                        | 99       | 78000                | 2,5-dimethyl-2-hexene 17%<br>2,5-dimethylhexane 1%<br>2,5-dimethyl- <i>cis</i> -3-hexene 5.5%<br>2,5-dimethyl- <i>trans</i> -3-hexene 76.5% |
| 12    |                            | 0.5                  | 29545                  | 10                        | 71       | 83905                | 2,5-dimethyl-2-hexene 17%<br>2,5-dimethylhexane 1%<br>2,5-dimethyl- <i>cis</i> -3-hexene 7%<br>2,5-dimethyl- <i>trans</i> -3-hexene 76%     |
| 13    |                            | 0.5                  | 39390                  | 10                        | 65.5     | 103210               | 2,5-dimethyl-2-hexene 21%<br>2,5-dimethylhexane 1%<br>2,5-dimethyl- <i>cis</i> -3-hexene 5.5%<br>2,5-dimethyl- <i>trans</i> -3-hexene 72.5% |
| 14    |                            | 0.5                  | 39390                  | 30                        | 99.5     | 156780               | 2,5-dimethyl-2-hexene 18%<br>2,5-dimethylhexane 1%<br>2,5-dimethyl- <i>cis</i> -3-hexene 6.5%<br>2,5-dimethyl- <i>trans</i> -3-hexene 74.5% |
| 15    |                            | 0.5                  | 65655                  | 10                        | 60       | 157570               | 2,5-dimethyl-2-hexene 23.5%<br>2,5-dimethylhexane 0.5%<br>2,5-dimethyl- <i>cis</i> -3-hexene 3%<br>2,5-dimethyl- <i>trans</i> -3-hexene 73% |
| 16    |                            | 0.5                  | 65655                  | 30                        | 99.5     | 261305               | 2,5-dimethyl-2-hexene 18%<br>2,5-dimethylhexane 1%<br>2,5-dimethyl- <i>cis</i> -3-hexene 6.5%<br>2,5-dimethyl- <i>trans</i> -3-hexene 74.5% |
| 17    | Isoprene                   | 0.5                  | 14035                  | 10                        | 100      | 56140                | 2-methyl-1-butene < 0.5%<br>2-methylbutane 38%<br>3-methyl-1-butene 6.5%<br>2-methyl-2-butene 55%                                           |
| 18    |                            | 0.5                  | 21055                  | 10                        | 100      | 84215                | 2-methyl-1-butene < 1%<br>2-methylbutane 19.5%<br>3-methyl-1-butene 9%<br>2-methyl-2-butene 71%                                             |
| 19    |                            | 0.5                  | 28070                  | 10                        | 91.5     | 102740               | 2-methyl-1-butene 16%<br>2-methylbutane 8%<br>3-methyl-1-butene 20%<br>2-methyl-2-butene 56%                                                |
| 20    |                            | 0.5                  | 56141                  | 10                        | 82       | 184145               | 2-methyl-1-butene 11%<br>2-methylbutane 4%<br>3-methyl-1-butene 12%<br>2-methyl-2-butene 73%                                                |
| 21    |                            | 0.5                  | 93570                  | 10                        | 72       | 269480               | 2-methyl-1-butene 13%<br>2-methylbutane 5%<br>3-methyl-1-butene 15%<br>2-methyl-2-butene 67%                                                |
| 22    |                            | 0.5                  | 93570                  | 30                        | 93       | 348080               | 2-methyl-1-butene 16.5%<br>2-methylbutane 9%<br>3-methyl-1-butene 23%<br>2-methyl-2-butene 51.5%                                            |

[a]Reaction conditions are: 80 °C, 15 min.

**Table S8.** Hydrogenation of dienes in the presence of G3-dendr-SiO<sub>2</sub>-Pd catalyst <sup>[a]</sup>

| Entry | Substrate          | Catalyst loading, mg       | Substrate/Pd (mol/mol) | P (Hz), atm. | Conv., % | TOF, h <sup>-1</sup> | Product distribution, %                                                                                                                         |                                                                                                                                             |
|-------|--------------------|----------------------------|------------------------|--------------|----------|----------------------|-------------------------------------------------------------------------------------------------------------------------------------------------|---------------------------------------------------------------------------------------------------------------------------------------------|
| 1     | 1,3-cyclooctadiene | 1                          | 3190                   | 10           | 9 [b]    | 1785                 | Cyclooctane 94%<br><i>cis</i> -cyclooctene 1%<br><i>trans</i> -cyclooctene 6%                                                                   |                                                                                                                                             |
| 2     | 1,5-cyclooctadiene | 1                          | 3235                   | 10           | 42       | 5440                 | Cyclooctane 100%<br>(substrate isomerization of 100%)                                                                                           |                                                                                                                                             |
| 3     | 1,3-cyclohexadiene | 1                          | 4170                   | 10           | 95       | 15835                | Cyclohexene 93%<br>Cyclohexane 7%                                                                                                               |                                                                                                                                             |
| 4     |                    | 0.5                        | 8335                   | 10           | 89.5     | 29840                | Cyclohexene 96%<br>Cyclohexane 4%                                                                                                               |                                                                                                                                             |
| 5     |                    | 0.5                        | 25005                  | 10           | 87       | 87020                | Cyclohexene 98%<br>Cyclohexane 2%                                                                                                               |                                                                                                                                             |
| 6     |                    | 0.5                        | 50010                  | 10           | 54.5     | 109025               | Cyclohexene 99.5%<br>Cyclohexane 0.5%                                                                                                           |                                                                                                                                             |
| 7     |                    | 0.5                        | 50010                  | 30           | 97       | 194045               | Cyclohexene 97%<br>Cyclohexane 3%                                                                                                               |                                                                                                                                             |
| 8     |                    | 0.5                        | 66700                  | 10           | 31       | 82685                | Cyclohexene ~ 100%                                                                                                                              |                                                                                                                                             |
| 9     |                    | 0.5                        | 66700                  | 30           | 92       | 245390               | Cyclohexene 98.5%<br>Cyclohexane 1.5%                                                                                                           |                                                                                                                                             |
| 10    |                    | 0.5                        | 166705                 | 30           | 48.5     | 323410               | Cyclohexene 99.5%<br>Cyclohexane 0.5%                                                                                                           |                                                                                                                                             |
| 11    |                    | 2,5-dimethyl-2,4-hexadiene | 1                      | 2785         | 10       | 100                  | 11140                                                                                                                                           | 2,5-dimethyl-2-hexene 17%<br>2,5-dimethylhexane 9.5%<br>2,5-dimethyl- <i>cis</i> -3-hexene 4.5%<br>2,5-dimethyl- <i>trans</i> -3-hexene 69% |
| 12    |                    |                            | 0.5                    | 5570         | 10       | 100                  | 22285                                                                                                                                           | 2,5-dimethyl-2-hexene 14.5%<br>2,5-dimethylhexane 5.5%<br>2,5-dimethyl- <i>cis</i> -3-hexene 5%<br>2,5-dimethyl- <i>trans</i> -3-hexene 75% |
| 13    | 0.5                |                            | 16710                  | 10           | 100      | 66850                | 2,5-dimethyl-2-hexene 18.5%<br>2,5-dimethylhexane 5%<br>2,5-dimethyl- <i>cis</i> -3-hexene 5%<br>2,5-dimethyl- <i>trans</i> -3-hexene 71.5%     |                                                                                                                                             |
| 14    | 0.5                |                            | 22285                  | 10           | 100      | 89130                | 2,5-dimethyl-2-hexene 17%<br>2,5-dimethylhexane 2%<br>2,5-dimethyl- <i>cis</i> -3-hexene 6.5%<br>2,5-dimethyl- <i>trans</i> -3-hexene 74.5%     |                                                                                                                                             |
| 15    | 0.5                |                            | 33425                  | 10           | 86       | 114980               | 2,5-dimethyl-2-hexene 19%<br>2,5-dimethylhexane 0.5%<br>2,5-dimethyl- <i>cis</i> -3-hexene 4.5%<br>2,5-dimethyl- <i>trans</i> -3-hexene 76%     |                                                                                                                                             |
| 16    | 0.5                |                            | 33425                  | 30           | 100      | 133700               | 2,5-dimethyl-2-hexene 15.5%<br>2,5-dimethylhexane 4%<br>2,5-dimethyl- <i>cis</i> -3-hexene 5%<br>2,5-dimethyl- <i>trans</i> -3-hexene 75.5%     |                                                                                                                                             |
| 17    | 0.5                |                            | 44565                  | 10           | 71       | 126570               | 2,5-dimethyl-2-hexene 17.5%<br>2,5-dimethylhexane 0.5%<br>2,5-dimethyl- <i>cis</i> -3-hexene 7.5%<br>2,5-dimethyl- <i>trans</i> -3-hexene 74.5% |                                                                                                                                             |
| 18    | 0.5                |                            | 44565                  | 30           | 98.5     | 175590               | 2,5-dimethyl-2-hexene 18%<br>2,5-dimethylhexane 1%<br>2,5-dimethyl- <i>cis</i> -3-hexene 5%<br>2,5-dimethyl- <i>trans</i> -3-hexene 77%         |                                                                                                                                             |
| 19    | 0.5                |                            | 111415                 | 10           | 39       | 173810               | 2,5-dimethyl-2-hexene 25.5%<br>2,5-dimethyl- <i>cis</i> -3-hexene 7%<br>2,5-dimethyl- <i>trans</i> -3-hexene 67.5%                              |                                                                                                                                             |
| 20    | 0.5                |                            | 111415                 | 30           | 92       | 410010               | 2,5-dimethyl-2-hexene 20.5%<br>2,5-dimethylhexane 0.5%<br>2,5-dimethyl- <i>cis</i> -3-hexene 6%<br>2,5-dimethyl- <i>trans</i> -3-hexene 73%     |                                                                                                                                             |
| 21    | Isoprene           | 0.5                        | 15880                  | 10           | 100      | 63515                | 2-methylbutane 30%<br>3-methyl-1-butene 7.5%<br>2-methyl-2-butene 63.5%                                                                         |                                                                                                                                             |
| 22    |                    | 0.5                        | 31760                  | 10           | 100      | 127030               | 2-methyl-1-butene 3%<br>2-methylbutane 12%<br>3-methyl-1-butene 16%<br>2-methyl-2-butene 69%                                                    |                                                                                                                                             |



|    |     |        |    |      |        |                                                                                                  |
|----|-----|--------|----|------|--------|--------------------------------------------------------------------------------------------------|
| 23 | 0.5 | 47635  | 10 | 61.5 | 117195 | 2-methyl-1-butene 21%<br>2-methylbutane 4.5%<br>3-methyl-1-butene 26.5%<br>2-methyl-2-butene 48% |
| 24 | 0.5 | 63515  | 10 | 42   | 106705 | 2-methyl-1-butene 28%<br>2-methylbutane 3%<br>3-methyl-1-butene 25%<br>2-methyl-2-butene 44%     |
| 25 | 0.5 | 63515  | 30 | 100  | 254065 | 2-methyl-1-butene 9%<br>2-methylbutane 10.5%<br>3-methyl-1-butene 22%<br>2-methyl-2-butene 59%   |
| 26 | 0.5 | 158790 | 30 | 60   | 381095 | 2-methyl-1-butene 23%<br>2-methylbutane 1.5%<br>3-methyl-1-butene 30%<br>2-methyl-2-butene 45%   |

[a] Reaction conditions are: 80 °C, 15 min. [b] 45 min., an induction period of 30 min.

**Table S9.** Hydrogenation of dienes in the presence of *meso*-G2-dendr-Si-Pd catalyst <sup>[a]</sup>

| Entry | Substrate                  | Catalyst loading, mg | Substrate/Pd (mol/mol) | P (H <sub>2</sub> ), atm. | Conv., %          | TOF, h <sup>-1</sup> | Product distribution, %                                                                                                                     |
|-------|----------------------------|----------------------|------------------------|---------------------------|-------------------|----------------------|---------------------------------------------------------------------------------------------------------------------------------------------|
| 1     | 1,3-cyclooctadiene         | 1                    | 2770                   | 10                        | 44 <sup>[b]</sup> | 3935                 | Cyclooctane 10%<br><i>trans</i> -cyclooctene 90%                                                                                            |
| 2     | 1,5-cyclooctadiene         | 1                    | 2815                   | 10                        | 18                | 1040                 | Cyclooctane 16%<br><i>cis</i> -cyclooctene 84%<br>(substrate isomerization of 65.5%)                                                        |
| 3     |                            | 1                    | 5625                   | 10                        | 9.5               | 2140                 | Cyclooctane 8%<br><i>cis</i> -cyclooctene 80%<br><i>trans</i> -cyclooctene 12%<br>(substrate isomerization of 10%)                          |
| 4     | 1,3-cyclohexadiene         | 1                    | 3620                   | 10                        | 87                | 12605                | Cyclohexene 87%<br>Cyclohexane 13%                                                                                                          |
| 5     |                            | 0.5                  | 7245                   | 10                        | 86                | 24915                | Cyclohexene 91.5%<br>Cyclohexane 8.5%                                                                                                       |
| 6     |                            | 0.5                  | 7245                   | 30                        | 96                | 27815                | Cyclohexene 82%<br>Cyclohexane 18%                                                                                                          |
| 7     |                            | 0.5                  | 21730                  | 10                        | 68                | 59105                | Cyclohexene 97%<br>Cyclohexane 3%                                                                                                           |
| 8     |                            | 0.5                  | 21730                  | 30                        | 93.5              | 81270                | Cyclohexene 94%<br>Cyclohexane 6%                                                                                                           |
| 9     |                            | 0.5                  | 28975                  | 10                        | 43                | 49835                | Cyclohexene 95.5%<br>Cyclohexane 4.5%                                                                                                       |
| 10    |                            | 0.5                  | 28975                  | 30                        | 68                | 78810                | Cyclohexene 93.5%<br>Cyclohexane 6.5%                                                                                                       |
| 11    |                            | 0.5                  | 43460                  | 10                        | 33                | 57365                | Cyclohexene 96.5%<br>Cyclohexane 3.5%                                                                                                       |
| 12    |                            | 0.5                  | 43460                  | 30                        | 62.5              | 108650               | Cyclohexene 96%<br>Cyclohexane 4%                                                                                                           |
| 13    | 2,5-dimethyl-2,4-hexadiene | 1                    | 2420                   | 10                        | 82                | 7940                 | 2,5-dimethyl-2-hexene 18.5%<br>2,5-dimethylhexane 0.5%<br>2,5-dimethyl- <i>cis</i> -3-hexene 3%<br>2,5-dimethyl- <i>trans</i> -3-hexene 78% |
| 14    |                            | 0.5                  | 4840                   | 10                        | 64                | 12395                | 2,5-dimethyl-2-hexene 23%<br>2,5-dimethylhexane 1%<br>2,5-dimethyl- <i>cis</i> -3-hexene 4%<br>2,5-dimethyl- <i>trans</i> -3-hexene 72%     |
| 15    |                            | 0.5                  | 4840                   | 30                        | 99                | 19170                | 2,5-dimethyl-2-hexene 18%<br>2,5-dimethylhexane 1.5%<br>2,5-dimethyl- <i>cis</i> -3-hexene 0.5%<br>2,5-dimethyl- <i>trans</i> -3-hexene 80% |
| 16    |                            | 0.5                  | 9680                   | 10                        | 52                | 20140                | 2,5-dimethyl-2-hexene 21.5%<br>2,5-dimethylhexane 1%<br>2,5-dimethyl- <i>cis</i> -3-hexene 3%<br>2,5-dimethyl- <i>trans</i> -3-hexene 74.5% |
| 17    |                            | 0.5                  | 9680                   | 30                        | 74.5              | 28850                | 2,5-dimethyl-2-hexene 18%<br>2,5-dimethylhexane 1.5%<br>2,5-dimethyl- <i>cis</i> -3-hexene 2.5%<br>2,5-dimethyl- <i>trans</i> -3-hexene 78% |
| 18    |                            | 0.5                  | 14525                  | 10                        | 46                | 26720                | 2,5-dimethyl-2-hexene 16.5%<br>2,5-dimethylhexane 1%<br>2,5-dimethyl- <i>cis</i> -3-hexene 3%<br>2,5-dimethyl- <i>trans</i> -3-hexene 79.5% |
| 19    |                            | 0.5                  | 14525                  | 30                        | 56                | 32530                | 2,5-dimethyl-2-hexene 18%<br>2,5-dimethylhexane 0.5%<br>2,5-dimethyl- <i>cis</i> -3-hexene 2.5%<br>2,5-dimethyl- <i>trans</i> -3-hexene 79% |
| 20    | Isoprene                   | 0.5                  | 6900                   | 10                        | 95                | 26220                | 2-methyl-1-butene 11%<br>2-methylbutane 8.5%<br>3-methyl-1-butene 21.5%<br>2-methyl-2-butene 59%                                            |
| 21    |                            | 0.5                  | 13800                  | 10                        | 76                | 41950                | 2-methyl-1-butene 16%<br>2-methylbutane 9%<br>3-methyl-1-butene 24%<br>2-methyl-2-butene 51%                                                |
| 22    |                            | 0.5                  | 27600                  | 10                        | 61                | 67340                | 2-methyl-1-butene 21.5%<br>2-methylbutane 7%<br>3-methyl-1-butene 29.5%<br>2-methyl-2-butene 42%                                            |
| 23    |                            | 0.5                  | 27600                  | 30                        | 67                | 73960                | 2-methyl-1-butene 17.5%<br>2-methylbutane 7%<br>3-methyl-1-butene 24.5%                                                                     |

[a] Reaction conditions are: 80 °C, 15 min. [b] 30 min., an induction period of 15 min.

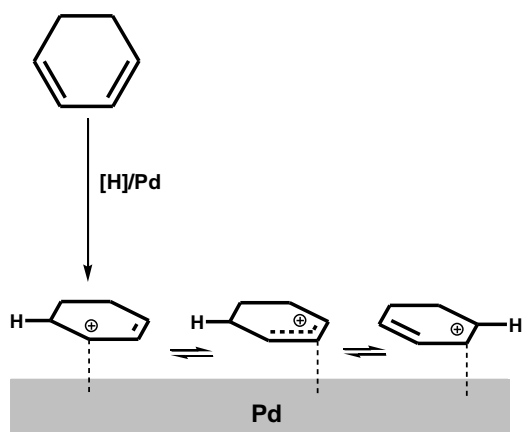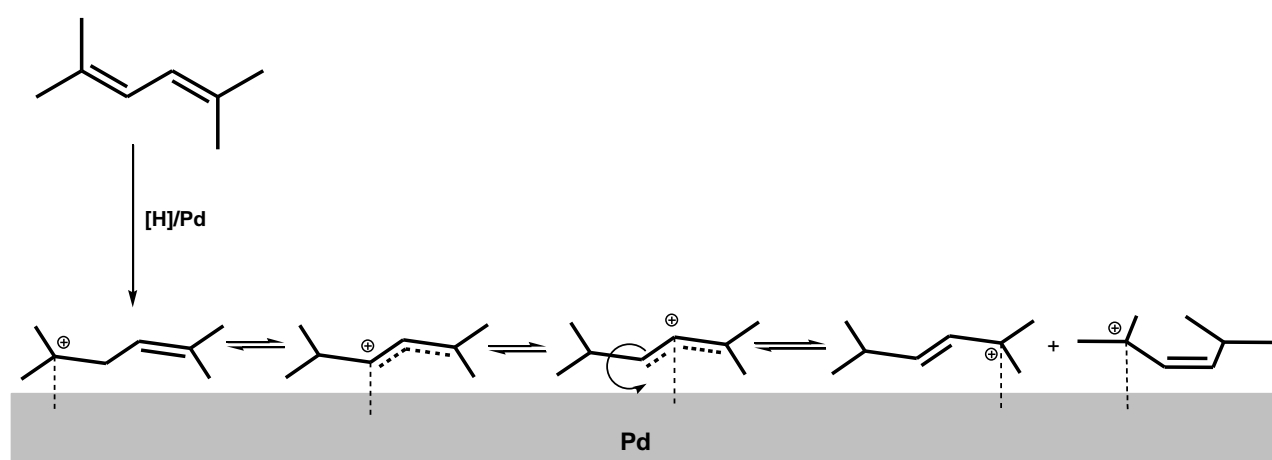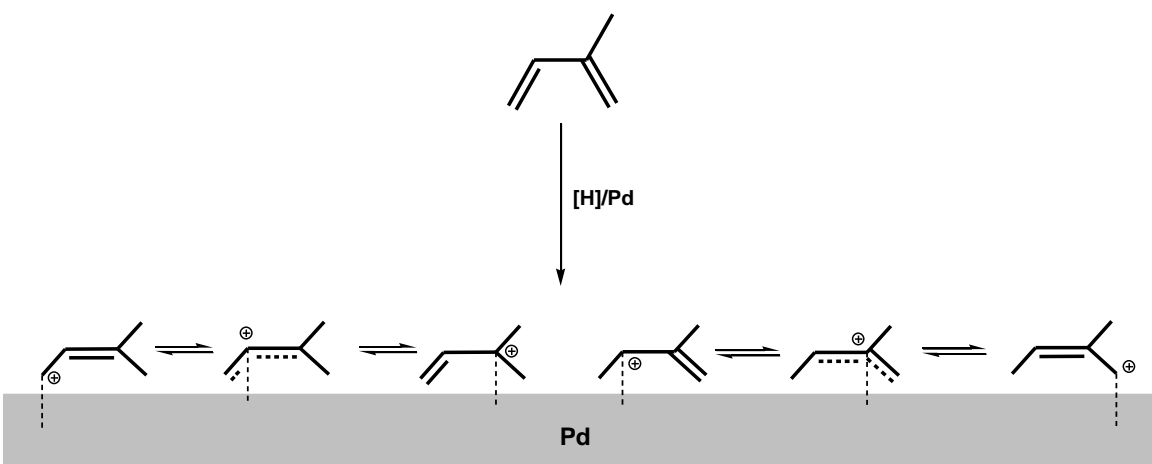

**Figure S19.**  $\pi$ -allylic intermediates, formed in the hydrogenation of conjugated dienes in the presence of Pd catalysts.

**Table S10.** Hydrogenation of alkynes in the presence of Pd catalysts

| Entry | Substrate                                                                 | Catalyst                                                                                 | Reaction conditions                                               | TOF, h <sup>-1</sup> | Main product                                   | Ref. |
|-------|---------------------------------------------------------------------------|------------------------------------------------------------------------------------------|-------------------------------------------------------------------|----------------------|------------------------------------------------|------|
| 1     | Phenylacetylene                                                           | Pd/Pb/CaCO <sub>3</sub> , quinoline                                                      | 25 °C, 1 atm. of H <sub>2</sub> , <i>n</i> -hexane                | 320–2900             | Styrene 90–95%                                 | 3    |
| 2     | Phenylacetylene                                                           | Pd/zeolite, Pd/C                                                                         | 25 °C, <i>n</i> -heptane, 1–20 atm. of H <sub>2</sub> ,           | 4230–70700           | Styrene 71–100%                                | 4    |
| 3     | Phenylacetylene                                                           | PtPd/zeolite                                                                             | 25 °C, 1 atm. of H <sub>2</sub> , THF                             | 302–2275             | Styrene 76–94%                                 | 5    |
| 4     | Phenylacetylene                                                           | Pd/polystyrene, quinoline                                                                | 18–50 °C, methanol, 1.4–4.8 atm. of H <sub>2</sub> ,              | 1570–6055            | Styrene 87–97%                                 | 6    |
| 5     | Phenylacetylene                                                           | Pd/montmorillonite                                                                       | 25 °C, 1 atm. of H <sub>2</sub> , toluene                         | 540–3745             | Styrene 95–100%                                | 7    |
| 6     | Phenylacetylene                                                           | Pd/MCM-41                                                                                | 25 °C, 1 atm. of H <sub>2</sub> , toluene                         | 18360–46440          | Styrene 84–95%                                 | 8    |
| 7     | Phenylacetylene                                                           | Pd/meso-silicas                                                                          | 25 °C, 1 atm. of H <sub>2</sub> , THF                             | 7200–14400           | Styrene 96%                                    | 9    |
| 8     | Phenylacetylene                                                           | Pd/TiO <sub>2</sub>                                                                      | 30 °C, 1 atm. of H <sub>2</sub>                                   | 1480–77040           | Styrene 86–90%                                 | 10   |
| 9     | Phenylacetylene                                                           | Pd/carbon fiber, laser ablation deposition                                               | 80 °C, 35 atm. of H <sub>2</sub>                                  | 147600–806400        | Styrene 79–93%                                 | 11   |
| 10    | 1-hexyne                                                                  | PdBi/Al <sub>2</sub> O <sub>3</sub>                                                      | 25 °C, 1 atm. of H <sub>2</sub> , toluene                         | 5190                 | 1-hexene 90–95%                                | 12   |
| 11    | 2-hexyne                                                                  | PdBi/Al <sub>2</sub> O <sub>3</sub>                                                      | 25 °C, 1 atm. of H <sub>2</sub> , toluene                         | 1555                 | <i>cis</i> -2-hexene 85–90%                    | 12   |
| 12    | 1-hexyne                                                                  | Pd/Pb/CaCO <sub>3</sub> , quinoline                                                      | 25 °C, 1 atm. of H <sub>2</sub> , toluene                         | 1555                 | 1-hexene 80–85%                                | 12   |
| 13    | 2-hexyne                                                                  | Pd/Pb/CaCO <sub>3</sub> , quinoline                                                      | 25 °C, 1 atm. of H <sub>2</sub> , toluene                         | 1560                 | <i>cis</i> -2-hexene 95–97%                    | 12   |
| 14    | 1-hexyne                                                                  | Pd/bypy-BMIM/CNF                                                                         | 30 °C, 10 atm. of H <sub>2</sub> , <i>n</i> -heptane              | 27360–218880         | 1-hexene 94–98%                                | 13   |
| 15    | 4-octyne                                                                  | Pd/montmorillonite                                                                       | 25 °C, 1 atm. of H <sub>2</sub> , toluene                         | 1295–3205            | <i>cis</i> -4-octene 89–92%                    | 7    |
| 16    | 4-octyne                                                                  | Pd/MCM-41                                                                                | 25 °C, 1 atm. of H <sub>2</sub> , toluene                         | 24840–66240          | <i>cis</i> -4-octene 91–93%                    | 8    |
| 17    | 1-butyne                                                                  | Pd/Al <sub>2</sub> O <sub>3</sub>                                                        | 20 °C, 20 atm. of H <sub>2</sub>                                  | 24000–216000         | 1-butene 87–95%                                | 14   |
| 18    | 1-butyne                                                                  | Pd/Al <sub>2</sub> O <sub>3</sub> , piperidine                                           | 20 °C, 20 atm. of H <sub>2</sub>                                  | 72000–216000         | 1-butene 87–95%                                | 15   |
| 19    | Intermediate products of vitamin synthesis with internal C≡C triple bonds | Pd/Pb/CaCO <sub>3</sub> , quinoline                                                      | 20 °C, 1 atm. of H <sub>2</sub> , petroleum ether                 | 70                   | β-carotenes 85–95%                             | 16   |
| 20    | Ethylphenylacetylene                                                      | Pd/MCM-41                                                                                | 25 °C, 1 atm. of H <sub>2</sub> , toluene                         | 10080–24840          | <i>cis</i> -β-ethylstyrene 88–91%              | 8    |
| 21    | Butylphenylacetylene                                                      | Pd/meso-silicas                                                                          | 25 °C, 1 atm. of H <sub>2</sub> , THF                             | 21600–216000         | <i>cis</i> -β-butylstyrene 79–83%              | 9    |
| 22    | Methylphenylacetylene                                                     | PdPt/Py-PAMAM-G2-C <sub>6</sub>                                                          | 25 °C, 1 atm. of H <sub>2</sub> , CH <sub>2</sub> Cl <sub>2</sub> | 143                  | β-methylstyrene 94% ( <i>cis/trans</i> ~ 94/6) | 17   |
| 23    | Diphenylacetylene                                                         | Pd/Al <sub>2</sub> O <sub>3</sub>                                                        | 25 °C, 5 atm. of H <sub>2</sub> , <i>n</i> -hexane                | 18720–83520          | <i>cis</i> -stilbene 71–94%                    | 18   |
| 24    | Diphenylacetylene                                                         | Pd/PEI                                                                                   | 25 °C, 1 atm. of H <sub>2</sub> , MeOH/1,4-dioxane                | 12                   | <i>cis</i> -stilbene 90–97%                    | 19   |
| 25    | Diphenylacetylene                                                         | Pd/PEI@SBA-15                                                                            | 25 °C, 1 atm. of H <sub>2</sub> , MeOH/1,4-dioxane                | 4120–5105            | <i>cis</i> -stilbene 90–93%                    | 20   |
| 26    | Phenylacetylene                                                           | PdCl <sub>2</sub> /DAB(N(CH <sub>2</sub> PPh <sub>2</sub> ) <sub>2</sub> ) <sub>16</sub> | 25 °C, 1 atm. of H <sub>2</sub> , ethanol                         | 155                  | Styrene 99%                                    | 21   |
| 27    | Phenylacetylene                                                           | Pd/PPI networks                                                                          | 80 °C, 10–30 atm. of H <sub>2</sub>                               | 25940–184840         | Styrene 90–96%                                 | 22   |
| 28    | Phenylacetylene                                                           | Pd/PAMAM networks                                                                        | 80 °C, 10 atm. of H <sub>2</sub>                                  | 2330–26865           | Styrene 78–95%                                 | 23   |
| 29    | 1-octyne                                                                  | Pd/PPI@MPF                                                                               | 80 °C, 10 atm. of H <sub>2</sub>                                  | 121320               | 1-octene 60–84%                                | 24   |
| 30    | 4-octyne                                                                  | Pd/PPI@MPF                                                                               | 80 °C, 10 atm. of H <sub>2</sub>                                  | 110640               | 4-octene 90–91%                                | 24   |
| 31    | 1-hexyne                                                                  | Pd/PPI@MPF                                                                               | 80 °C, 10 atm. of H <sub>2</sub>                                  | 90840                | 1-hexene 73–84%                                | 24   |
| 32    | Phenylacetylene                                                           | Scheme S1                                                                                | 70 °C, 10–30 atm. of H <sub>2</sub> , benzene                     | 52550–103160         | Styrene 87–97%                                 | 1    |
| 33    | Phenylacetylene                                                           | PdAg/PPI-3@SPC                                                                           | 80 °C, 10 atm. of H <sub>2</sub>                                  | 3600–30505           | Styrene 86–98%                                 | 25   |
| 34    | 1-octyne                                                                  | PdAg/PPI-3@SPC                                                                           | 80 °C, 10–30 atm. of H <sub>2</sub>                               | 17220–29995          | 1-octene 77–93%                                | 25   |
| 35    | 4-octyne                                                                  | PdAg/PPI-3@SPC                                                                           | 80 °C, 10 atm. of H <sub>2</sub>                                  | 3470                 | 4-octene 90–95%                                | 25   |

|    |                 |                                             |                                    |               |                 |           |
|----|-----------------|---------------------------------------------|------------------------------------|---------------|-----------------|-----------|
| 36 | Phenylacetylene | G2-dendr- <i>meso</i> -SiO <sub>2</sub> -Pd | 80°C, 10–30 atm. of H <sub>2</sub> | 32215–57530   | Styrene 84–96%  | This work |
| 37 | Phenylacetylene | <i>meso</i> -G2-dendr-Si-Pd                 | 80°C, 10–30 atm. of H <sub>2</sub> | 18350–69755   | Styrene 87–94%  | This work |
| 38 | Phenylacetylene | G3-dendr-SiO <sub>2</sub> -Pd               | 80°C, 10–30 atm. of H <sub>2</sub> | 28780–80995   | Styrene 90–98%  | This work |
| 39 | 1-octyne        | G2-dendr- <i>meso</i> -SiO <sub>2</sub> -Pd | 80°C, 10–30 atm. of H <sub>2</sub> | 55100–171305  | 1-octene 87–97% | This work |
| 40 | 1-octyne        | <i>meso</i> -G2-dendr-Si-Pd                 | 80°C, 10–30 atm. of H <sub>2</sub> | 14785–211920  | 1-octene 78–93% | This work |
| 41 | 1-octyne        | G3-dendr-SiO <sub>2</sub> -Pd               | 80°C, 10atm. of H <sub>2</sub>     | 316545        | 1-octene 93–94% | This work |
| 42 | 1-hexyne        | G2-dendr- <i>meso</i> -SiO <sub>2</sub> -Pd | 80°C, 10–30 atm. of H <sub>2</sub> | 33240–276805  | 1-hexene 73–93% | This work |
| 43 | 1-hexyne        | <i>meso</i> -G2-dendr-Si-Pd                 | 80°C, 10–30 atm. of H <sub>2</sub> | 150980–404415 | 1-hexene 89–97% | This work |
| 42 | 1-hexyne        | G3-dendr-SiO <sub>2</sub> -Pd               | 80°C, 10–30 atm. of H <sub>2</sub> | 23430–234290  | 1-hexene 80–90% | This work |

**Table S11.** Hydrogenation of dienes in the presence of Pd catalysts

| Entry | Substrate              | Catalyst                                                                                                           | Reaction conditions                                               | TOF, h <sup>-1</sup> | Main products                                                                              | Ref. |
|-------|------------------------|--------------------------------------------------------------------------------------------------------------------|-------------------------------------------------------------------|----------------------|--------------------------------------------------------------------------------------------|------|
| 1     | 1,3-dutadiene          | Pd/Al <sub>2</sub> O <sub>3</sub>                                                                                  | 100°C, 0.01 atm. of H <sub>2</sub> , Ar                           | 3600–36000           | 1-butene ~25–50%<br><i>trans</i> -2-butene ~45–55%                                         | 26   |
| 2     | 1,3-dutadiene          | Pd/Al <sub>2</sub> O <sub>3</sub>                                                                                  | 227°C, 0.7–2.7 atm. of H <sub>2</sub> , Ar                        | 685–7920             | Butenes ~40–80%                                                                            | 27   |
| 3     | 1,3-dutadiene          | Co/Al <sub>2</sub> O <sub>3</sub>                                                                                  | 144°C, 0.1–0.2 atm. of H <sub>2</sub>                             | 0.25–0.27            | 1-butene 28–51%<br><i>trans</i> -2-butene 31–56%                                           | 28   |
| 4     | 1,3-dutadiene          | Pd/SiO <sub>2</sub> , PdAu/SiO <sub>2</sub>                                                                        | 20°C, 0.1–0.2 atm. of H <sub>2</sub>                              | 2.8–5                | 1-butene 47–50%<br><i>trans</i> -2-butene 43–48%                                           | 28   |
| 5     | 1,3-cyclopentadiene    | Pd/C                                                                                                               | 20°C, 1 atm. of H <sub>2</sub> ,<br>toluene or methanol           | 295                  | Cyclopentene 92–95%                                                                        | 29   |
| 6     | 1,3-cyclopentadiene    | Pd/Al <sub>2</sub> O <sub>3</sub>                                                                                  | 20°C, 1 atm. of H <sub>2</sub> ,<br>toluene or methanol           | 10840                | Cyclopentene 98–100%                                                                       | 29   |
| 7     | Isoprene               | Pd/CaCO <sub>3</sub>                                                                                               | 0°C, 1 atm. of H <sub>2</sub> , ethanol                           | 17340                | 2-methyl-1-butene 25.5%<br>3-methyl-1-butene 31.5%<br>2-methyl-2-butene 43%                | 30   |
| 8     | Isoprene               | Pd/BaSO <sub>4</sub>                                                                                               | 0°C, 1 atm. of H <sub>2</sub> , ethanol                           | 63780                | 2-methyl-1-butene 24.5%<br>3-methyl-1-butene 30%<br>2-methyl-2-butene 45.5%                | 30   |
| 9     | Isoprene               | Pd/C                                                                                                               | 0°C, 1 atm. of H <sub>2</sub> , ethanol                           | 17760                | 2-methyl-1-butene 24%<br>3-methyl-1-butene 29%<br>2-methyl-2-butene 47%                    | 30   |
| 10    | Isoprene               | Pd black                                                                                                           | 0°C, 1 atm. of H <sub>2</sub> , ethanol                           | 91500                | 2-methyl-1-butene 24.5%<br>3-methyl-1-butene 29%<br>2-methyl-2-butene 46.5%                | 30   |
| 11    | Isoprene               | Pd/Al <sub>2</sub> O <sub>3</sub>                                                                                  | 0°C, 1 atm. of H <sub>2</sub> , ethanol                           | 11760                | 2-methyl-1-butene 25%<br>3-methyl-1-butene 25%<br>2-methyl-2-butene 50%                    | 30   |
| 12    | Isoprene               | Pd/SiO <sub>2</sub>                                                                                                | 0°C, 1 atm. of H <sub>2</sub> , ethanol                           | 23160                | 2-methyl-1-butene 24.5%<br>3-methyl-1-butene 25%<br>2-methyl-2-butene 50.5%                | 30   |
| 13    | Isoprene               | PdAg/SiO <sub>2</sub>                                                                                              | 0°C, 1 atm. of H <sub>2</sub> , ethanol                           | 36780–104100         | 2-methyl-1-butene 26.5–27.5%<br>3-methyl-1-butene 25.5–29.5%<br>2-methyl-2-butene 44–48%   | 30   |
| 14    | Isoprene               | PdAu/SiO <sub>2</sub>                                                                                              | 0°C, 1 atm. of H <sub>2</sub> , ethanol                           | 22380–217800         | 2-methyl-1-butene 24.5–27.5%<br>3-methyl-1-butene 25–30.5%<br>2-methyl-2-butene 42.5–50.5% | 30   |
| 15    | Isoprene               | Pd/Al <sub>2</sub> O <sub>3</sub> , egg-shell                                                                      | 40–44°C, 30 atm. of H <sub>2</sub> ,<br><i>n</i> -heptane         | 470–1650             | Methylbutenes 85–90%                                                                       | 31   |
| 16    | 1,3-dutadiene          | Pd/Al <sub>2</sub> O <sub>3</sub>                                                                                  | 20 °C, 20 atm. of H <sub>2</sub>                                  | 24000                | 1-butene 48–50%<br><i>trans</i> -2-butene 45–46%                                           | 14   |
| 17    | 1,3-dutadiene          | Pd/Al <sub>2</sub> O <sub>3</sub> , piperidine                                                                     | 20 °C, 20 atm. of H <sub>2</sub>                                  | 36000                | 1-butene 48–50%<br><i>trans</i> -2-butene 45–46%                                           | 15   |
| 18    | Isoprene               | Pd/Nylon-6,6                                                                                                       | 50°C, 1 atm. of H <sub>2</sub> ,<br>various solvents              | 85–2905              | Alkenes 65–99%                                                                             | 32   |
| 19    | 1,3-pentadiene         | Pd/Nylon-6,6                                                                                                       | 50°C, 1 atm. of H <sub>2</sub> ,<br>various solvents              | 85–3590              | Alkenes 53–99%                                                                             | 32   |
| 20    | Isoprene               | Pd <sub>2</sub> (Ph <sub>2</sub> PCH <sub>2</sub> PPh <sub>2</sub> ) <sub>3</sub>                                  | 25 °C, 1 atm. of H <sub>2</sub> , toluene                         | 0.5                  | 2-methyl-1-butene 28%<br>3-methyl-1-butene 22.5%<br>2-methyl-2-butene 49.5 %               | 33   |
| 21    | 1,3-pentadiene         | Pd <sub>2</sub> (Ph <sub>2</sub> PCH <sub>2</sub> PPh <sub>2</sub> ) <sub>3</sub>                                  | 25 °C, 1 atm. of H <sub>2</sub> , toluene                         | 0.44–0.8             | 1-pentene 16–30%<br><i>cis</i> -2-pentene 10–30.5%<br><i>trans</i> -2-pentene 38–65.5%     | 33   |
| 22    | 1,3-cyclohexadiene     | Pd <sub>2</sub> (Ph <sub>2</sub> PCH <sub>2</sub> PPh <sub>2</sub> ) <sub>3</sub>                                  | 25 °C, 1 atm. of H <sub>2</sub> , toluene                         | 0.58                 | Cyclohexene 95.5%                                                                          | 33   |
| 23    | 1,3-cyclohexadiene     | Pd <sub>2</sub> (Ph <sub>2</sub> PCH <sub>2</sub> PPh <sub>2</sub> ) <sub>3</sub> ,<br><i>i</i> -PrNH <sub>2</sub> | 25 °C, 1 atm. of H <sub>2</sub> , toluene                         | 0.065                | Cyclohexene 99.5%                                                                          | 33   |
| 24    | 1,3-cyclooctadiene     | PdPt/Py-PAMAM-G2-C <sub>6</sub>                                                                                    | 25 °C, 1 atm. of H <sub>2</sub> , CH <sub>2</sub> Cl <sub>2</sub> | 3920–23500           | Cyclooctene 100%                                                                           | 17   |
| 25    | 1,3-cyclooctadiene     | RhPd/PAMAM-G4                                                                                                      | 20 °C, 1 atm. of H <sub>2</sub> , ethanol                         | 850–1300             | Cyclooctene 100%                                                                           | 34   |
| 26    | 1,3-cyclooctadiene     | Pd/G-1-triazol-derrocenyl<br>carbosilane dendrimer                                                                 | 25 °C, 1 atm. of H <sub>2</sub>                                   | 1150                 | Cyclohexene 100%                                                                           | 35   |
| 27    | 1,3-cyclooctadiene     | Pd/G-1-triazol-derrocenyl<br>carbosilane dendrimer                                                                 | 25 °C, 1 atm. of H <sub>2</sub>                                   | 530                  | Cyclooctene 100%                                                                           | 35   |
| 28    | 1,3,5-cycloheptatriene | Pd/G-1-triazol-derrocenyl<br>carbosilane dendrimer                                                                 | 25 °C, 1 atm. of H <sub>2</sub>                                   | 130                  | Cycloheptene 100%                                                                          | 35   |
| 29    | 2,5-dimethyl-          | Pd/G-1-triazol-derrocenyl                                                                                          | 25 °C, 1 atm. of H <sub>2</sub>                                   | 1040                 | 2,5-dimethyl-2-hexene 78%                                                                  | 35   |

|    |                                           |                                                                                          |                                               |              |  |                                                                                                                                       |           |
|----|-------------------------------------------|------------------------------------------------------------------------------------------|-----------------------------------------------|--------------|--|---------------------------------------------------------------------------------------------------------------------------------------|-----------|
|    | 2,4-hexadiene                             | carbosilane dendrimer                                                                    |                                               |              |  | <i>trans</i> -2,5-dimethyl-3-hexene 22%                                                                                               |           |
| 30 | 2,6-dimethyl-2,4,6-octatriene             | Pd/G-1-triazol-derrocenyl carbosilane dendrimer                                          | 25 °C, 1 atm. of H <sub>2</sub>               | 480          |  | Alkenes 100%                                                                                                                          | 35        |
| 31 | 1,3-cyclopentadiene                       | PdCl <sub>2</sub> /DAB(N(CH <sub>2</sub> PPh <sub>2</sub> ) <sub>2</sub> ) <sub>16</sub> | 25 °C, 1 atm. of H <sub>2</sub> , ethanol     | 445          |  | Cyclopentene 100%                                                                                                                     | 21        |
| 32 | 1,3-cyclohexadiene                        | PdCl <sub>2</sub> /DAB(N(CH <sub>2</sub> PPh <sub>2</sub> ) <sub>2</sub> ) <sub>16</sub> | 25 °C, 1 atm. of H <sub>2</sub> , ethanol     | 690          |  | Cyclohexene 99.5%                                                                                                                     | 21        |
| 33 | 1,3-cyclooctadiene                        | PdCl <sub>2</sub> /DAB(N(CH <sub>2</sub> PPh <sub>2</sub> ) <sub>2</sub> ) <sub>16</sub> | 25 °C, 1 atm. of H <sub>2</sub> , ethanol     | 575          |  | Cyclooctene 100%                                                                                                                      | 21        |
| 34 | Isoprene                                  | PdCl <sub>2</sub> /DAB(N(CH <sub>2</sub> PPh <sub>2</sub> ) <sub>2</sub> ) <sub>16</sub> | 25 °C, 1 atm. of H <sub>2</sub> , ethanol     | 580          |  | Alkenes 100%                                                                                                                          | 21        |
| 35 | 1,3-cyclopentadiene                       | Pd/PPI-(G3-G5)-TEBA                                                                      | 30 °C, 1 atm. of H <sub>2</sub> , toluene     | 670–740      |  | Cyclopentene 100%                                                                                                                     | 36        |
| 36 | 1,3-cyclohexadiene                        | Pd/PPI-(G3-G5)-TEBA                                                                      | 30 °C, 1 atm. of H <sub>2</sub> , toluene     | 580–790      |  | Cyclohexene 99.5%                                                                                                                     | 36        |
| 37 | 1,3-cyclooctadiene                        | Pd/PPI-(G3-G5)-TEBA                                                                      | 30 °C, 1 atm. of H <sub>2</sub> , toluene     | 230–435      |  | Cyclooctene 100%                                                                                                                      | 36        |
| 38 | 1,3-cyclohexadiene                        | Pd(dba)/PAMAM-(G0-G2)-PPh <sub>2</sub> @SiO <sub>2</sub>                                 | 25 °C, 1 atm. of H <sub>2</sub> , methanol    | 115–250      |  | Cyclohexene 73–99%                                                                                                                    | 37        |
| 39 | 1,3-cycloheptadiene                       | Pd(dba)/PAMAM-(G0-G2)-PPh <sub>2</sub> @SiO <sub>2</sub>                                 | 25 °C, 1 atm. of H <sub>2</sub> , methanol    | 150          |  | Cycloheptene 92–95%                                                                                                                   | 37        |
| 40 | 1,3-cyclooctadiene                        | Pd(dba)/PAMAM-(G0-G2)-PPh <sub>2</sub> @SiO <sub>2</sub>                                 | 25 °C, 1 atm. of H <sub>2</sub> , methanol    | 320          |  | Cyclooctene 98–100%                                                                                                                   | 37        |
| 41 | 1,2,3,4,5-pentamethyl-1,3-cyclopentadiene | Pd(dba)/PAMAM-(G0-G2)-PPh <sub>2</sub> @SiO <sub>2</sub>                                 | 25 °C, 1 atm. of H <sub>2</sub> , methanol    | 780          |  | Pentamethylcyclopentene 78%                                                                                                           | 37        |
| 42 | 2,4-dimethyl-1,3-pentadiene               | Pd(dba)/PAMAM-(G0-G2)-PPh <sub>2</sub> @SiO <sub>2</sub>                                 | 25 °C, 1 atm. of H <sub>2</sub> , methanol    | 135–365      |  | 2,4-dimethyl-1-pentene 39–48%<br>2,4-dimethyl-2-pentene 52–59%                                                                        | 37        |
| 43 | 3-methyl-1,3-hexadiene                    | Pd(dba)/PAMAM-(G0-G2)-PPh <sub>2</sub> @SiO <sub>2</sub>                                 | 25 °C, 1 atm. of H <sub>2</sub> , methanol    | 60–365       |  | 3-methyl-2-hexene 6–21%<br>3-methyl-3-hexene 68–81%<br>3-methylhexane 11–24%                                                          | 37        |
| 44 | 1-phenyl-2-methyl-1,3-butadiene           | Pd(dba)/PAMAM-(G0-G2)-PPh <sub>2</sub> @SiO <sub>2</sub>                                 | 25 °C, 1 atm. of H <sub>2</sub> , methanol    | 55–135       |  | 1-phenyl-2-methyl-1-butene 46–67%<br>3-methyl-4-phenyl-1-butene 3–10%<br>3-methyl-4-phenyl-2-butene 13–19%<br>sec-butylbenzene 10–33% | 37        |
| 45 | Isoprene                                  | Scheme S1                                                                                | 70 °C, 10–30 atm. of H <sub>2</sub> , toluene | 3680–232210  |  | 2-methyl-1-butene 22–30%<br>3-methyl-1-butene 16.5–22%<br>2-methyl-2-butene 47.5–58%                                                  | 1         |
| 46 | 2,5-dimethyl-2,4-hexadiene                | Scheme S1                                                                                | 70 °C, 10–30 atm. of H <sub>2</sub> , benzene | 2375–9605    |  | 2,5-dimethyl-2-hexene 25–28%<br><i>cis</i> -2,5-dimethyl-3-hexene 2.5–9.5%<br><i>trans</i> -2,5-dimethyl-3-hexene 62.5–70%            | 1         |
| 47 | 2,5-dimethyl-2,4-hexadiene                | Pd/PAMAM networks                                                                        | 80°C, 10 atm. of H <sub>2</sub>               | 2605–27966   |  | 2,5-dimethyl-2-hexene 18–22%<br><i>trans</i> -2,5-dimethyl-3-hexene 70–77%                                                            | 23        |
| 48 | 1,3-cyclohexadiene                        | Pd/PPI networks                                                                          | 80°C, 10–30 atm. of H <sub>2</sub>            | 56950–160100 |  | Cyclohexene 90–100%                                                                                                                   | 22        |
| 49 | 2,5-dimethyl-2,4-hexadiene                | Pd/PPI networks                                                                          | 80°C, 10–30 atm. of H <sub>2</sub>            | 1130–39455   |  | 2,5-dimethyl-2-hexene 20–25%<br><i>trans</i> -2,5-dimethyl-3-hexene 70–75%                                                            | 22        |
| 50 | 1,3-cyclooctadiene                        | <i>meso</i> -G2-dendr-Si-Pd                                                              | 80°C, 10 atm. of H <sub>2</sub>               | 3935         |  | <i>trans</i> -cyclooctene 90–95%                                                                                                      | This work |
| 51 | 1,3-cyclohexadiene                        | <i>meso</i> -G2-dendr-Si-Pd                                                              | 80°C, 10–30 atm. of H <sub>2</sub>            | 12605–108650 |  | Cyclohexene 82–97%                                                                                                                    | This work |
| 52 | 2,5-dimethyl-2,4-hexadiene                | <i>meso</i> -G2-dendr-Si-Pd                                                              | 80°C, 10–30 atm. of H <sub>2</sub>            | 12395–32530  |  | 2,5-dimethyl-2-hexene 16–23%<br><i>trans</i> -2,5-dimethyl-3-hexene 72–80%                                                            | This work |
| 53 | Isoprene                                  | <i>meso</i> -G2-dendr-Si-Pd                                                              | 80°C, 10–30 atm. of H <sub>2</sub>            | 26220–73960  |  | 2-methyl-1-butene 11–21.5%<br>3-methyl-1-butene 21.5–29%<br>2-methyl-2-butene 42–59%                                                  | This work |
| 54 | 1,3-cyclohexadiene                        | G2-dendr- <i>meso</i> -SiO <sub>2</sub> -Pd                                              | 80°C, 10–30 atm. of H <sub>2</sub>            | 56585–302560 |  | Cyclohexene 94–100%                                                                                                                   | This work |
| 55 | 2,5-dimethyl-2,4-hexadiene                | G2-dendr- <i>meso</i> -SiO <sub>2</sub> -Pd                                              | 80°C, 10–30 atm. of H <sub>2</sub>            | 39390–261305 |  | 2,5-dimethyl-2-hexene 16.5–23.5%<br><i>trans</i> -2,5-dimethyl-3-hexene 72.5–76.5%                                                    | This work |
| 56 | Isoprene                                  | G2-dendr- <i>meso</i> -SiO <sub>2</sub> -Pd                                              | 80°C, 10–30 atm. of H <sub>2</sub>            | 56140–348080 |  | 2-methyl-1-butene 11–16.5%<br>3-methyl-1-butene 12–23%<br>2-methyl-2-butene 51.5–73%                                                  | This work |
| 57 | 1,3-cyclohexadiene                        | G3-dendr-SiO <sub>2</sub> -Pd                                                            | 80°C, 10–30 atm. of H <sub>2</sub>            | 15835–323410 |  | Cyclohexene 93–100%                                                                                                                   | This work |
| 58 | 2,5-dimethyl-2,4-hexadiene                | G3-dendr-SiO <sub>2</sub> -Pd                                                            | 80°C, 10–30 atm. of H <sub>2</sub>            | 11140–410010 |  | 2,5-dimethyl-2-hexene 14.5–25.5%<br><i>trans</i> -2,5-dimethyl-3-hexene 67.5–77%                                                      | This work |
| 59 | Isoprene                                  | G3-dendr-SiO <sub>2</sub> -Pd                                                            | 80°C, 10–30 atm. of H <sub>2</sub>            | 63515–381095 |  | 2-methyl-1-butene 9–28%<br>3-methyl-1-butene 16–30%<br>2-methyl-2-butene 44–69%                                                       | This work |



- [1] E. Karakhanov, A. Maximov, Yu. Kardasheva, V. Semernina, A. Zolotukhina, A. Ivanov, G. Abbott, E. Rosenberg, V. Vinokurov, *ACS Appl. Mater. Interfaces* **2014**, *6*, 8807–8816
- [2] a) Electronic Database Web-EMAPS Diffraction Utilities, <http://emaps.mrl.uiuc.edu/emaps.asp>; b) J.W. Arblaster, *Platinum Metals Rev.* **2012**, *56*, 181–189; c) S. Navaladian, B. Viswanathan, T.K. Varadarajan, R. P. Viswanath, *Nanoscale Res. Lett.* **2009**, *4*, 181–186; d) N. Mejias, A. Serra-Muns, R. Pleixats, A. Shafir, M. Tristany, *Dalton Trans.* **2009**, 7748–7755
- [3] H. Lindlar, R. Dubuis, *Org. Synth.* **1973**, *5*, 880–881; **1966**, *46*, 89–90
- [4] G. Carturan, G. Facchin, G. Cocco, S. Enzo, G. Navazio, *J. Catal.* **1982**, *76*, 405–417
- [5] G. Carturan, G. Cocco, G. Facchin, G. Navazio, *J. Mol. Catal.* **1984**, *26*, 375–384
- [6] M.A. Aramendía, V. Borau, C. Jiménez, J.M. Marinas, M.E. Sempere, F.J. Urbano, *Appl. Catal.* **1990**, *63*, 375–389
- [7] Á. Mastalir, Z. Király, F. Berger, *Appl. Catal. A: Gen.* **2004**, *269*, 161–168
- [8] A. Papp, Á. Molnár, Á. Mastalir, *Appl. Catal. A: Gen.* **2005**, *289*, 256–266
- [9] N. Marín-Astorga, G. Pecchi, T.J. Pinnavaia, G. Alvez-Manoli, P. Reyes, *J. Mol. Catal. A: Chem.* **2006**, *247*, 145–152
- [10] P. Weerachawanasak, O. Mekasuwandumrong, M. Arai, Sh.-I. Fujita, P. Praserttham, J. Panpranot, *J. Catal.* **2009**, *262*, 199–205
- [11] E.A. Karakhanov, I.A. Aksenov, S.V. Kardashev, A.L. Maksimov, F.N. Putilin, A.N. Shatokhin, S.V. Savilov, *Appl. Catal. A: Gen.* **2013**, *464–465*, 253–260
- [12] J.A. Anderson, J. Mellor, R.P.K. Wells, *J. Catal.* **2009**, *261*, 208–216
- [13] M. Crespo-Quesada, R.R. Dykeman, G. Laurenczy, P.J. Dyson, L. Kiwi-Minsker, *J. Catal.* **2011**, *279*, 66–74
- [14] J.P. Boitiaux, J. Cosyns, S. Vasudevan, *Appl. Catal.* **1983**, *6*, 41–51
- [15] J.P. Boitiaux, J. Cosyns, S. Vasudevan, *Appl. Catal.* **1985**, *15*, 317–326
- [16] H. Lindlar, *Helv. Chim. Acta* **1952**, *35*, 446–450
- [17] M. Murata, Yu. Tanaka, T. Mizugaki, K. Ebitani, K. Kaneda, *Chem. Lett.* **2005**, *34*, 272–273
- [18] a) A.Yu. Stakheev, P.V. Markov, A.S. Taranenko, G.O. Bragina, G.N. Baeva, O.P. Tkachenko, I.S. Mashkovskii, A.S. Kashin, *Kinet. Catal.* **2015**, *56*, 733–740; b) P.V. Markov, O.V. Turova, I.S. Mashkovsky, A.K. Khudorozhkov, V.I. Bukhtiyarov, A.Yu. Stakheev, *Mendeleev Commun.* **2015**, *25*, 367–369
- [19] Sh. Mori, T. Ohkubo, T. Ikawa, A. Kume, T. Maegawa, Ya. Monguchi, H. Sajiki, *J. Mol. Catal. A: Chem.* **2009**, *307*, 77–87
- [20] W. Long, N.A. Brunelli, S.A. Didas, E.W. Ping, C.W. Jones, *ACS Catal.* **2013**, *3*, 1700–1708
- [21] T. Mizugaki, M. Ooe, K. Ebitani, K. Kaneda, *J. Mol. Catal. A: Chem.* **1999**, *145*, 329–333
- [22] E.A. Karakhanov, A.L. Maximov, E.M. Zakharyan, A.V. Zolotukhina, A.O. Ivanov, *Mol. Catal.* **2017**, *440*, 107–119
- [23] E.A. Karakhanov, A.L. Maksimov, E.M. Zakharian, Yu.S. Kardasheva, S.V. Savilov, N.I. Truhmanova, A.O. Ivanov, V.A. Vinokurov, *J. Mol. Catal. A: Chem.* **2015**, *397*, 1–18
- [24] M.P. Boronoev, A.V. Zolotukhina, V.I. Ignatyeva, M.V. Terenina, A.L. Maximov, E. A. Karakhanov, *Macromol. Symp.* **2016**, *363*, 57–63
- [25] E.A. Karakhanov, A.L. Maximov, A.V. Zolotukhina, N. Yatmanova, E. Rosenberg, *Appl. Organomet. Chem.* **2015**, *29*, 777–784
- [26] J. Silvestre-Albero, G. Rupprechter, H.-J. Freund, *Chem. Commun.* **2006**, 80–82
- [27] L. Piccolo, A. Valcarcel, M. Bausach, C. Thomazeau, D. Uzio, G. Berhault, *Phys. Chem. Chem. Phys.* **2008**, *10*, 5504–5506
- [28] B.J. Joice, J.J. Rooney, P.B. Wells, G.R. Wilson, *Discuss. Faraday Soc.* **1966**, 223–236
- [29] L. Černý, J. Vopatová, V. Ruzička, *React. Kinet. Catal. Lett.* **1982**, *19*, 223–226
- [30] G.C. Bond, A.F. Rawle, *J. Mol. Catal. A: Chem.* **1996**, *109*, 261–271
- [31] a) T.-B. Lin, T.-C. Chou, *Appl. Catal. A: Gen.* **1994**, *108*, 7–19; b) J.-Ch. Chang, Ts.-Ch. Chou, *Appl. Catal. A: Gen.* **1997**, *156*, 193–205
- [32] R.P. Macdonald, J.M. Winterbottom, *J. Catal.* **1979**, *57*, 195–207
- [33] E.W. Stern, P.K. Maples, *J. Catal.* **1972**, *27*, 120–133
- [34] Yo.-M. Chung, H.-K. Rhee, *J. Mol. Catal. A: Chem.* **2003**, *206*, 291–298
- [35] C. Ornelas, J. Ruiz, L. Salmon, D. Astruc, *Chem. Eur. J.* **2008**, *14*, 50–64
- [36] M. Ooe, M. Murata, T. Mizugaki, T. Ebitani, K. Kaneda, *Nanolett.* **2002**, *2*, 999–1002
- [37] P.P. Zweni, H. Alper, *Adv. Synth. Catal.* **2006**, *348*, 725–731
